# Supplementary material for: Opposing activities of the Ras and Hippo pathways converge on regulation of YAP protein turnover
Source: PubMed Central journal article supplement (PMC4283404; doi:10.15252/embj.201489385), 2014-09-01

Fig 4A

YAP IP (rabbit anti-YAP)

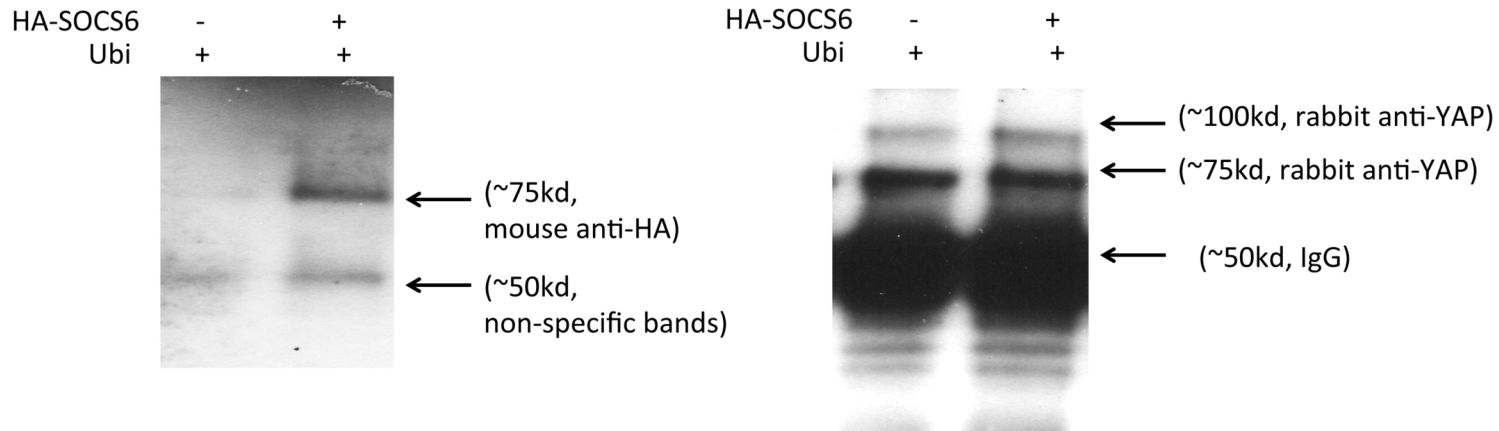

Fig 4A Input (total lysates)

Antibody used:

1. Rabbit anti-YAP
2. Mouse anti-tubulin
3. Mouse anti-HA

Membrane first probed for YAP and tubulin;  
Then membrane was then stripped and probed for HA

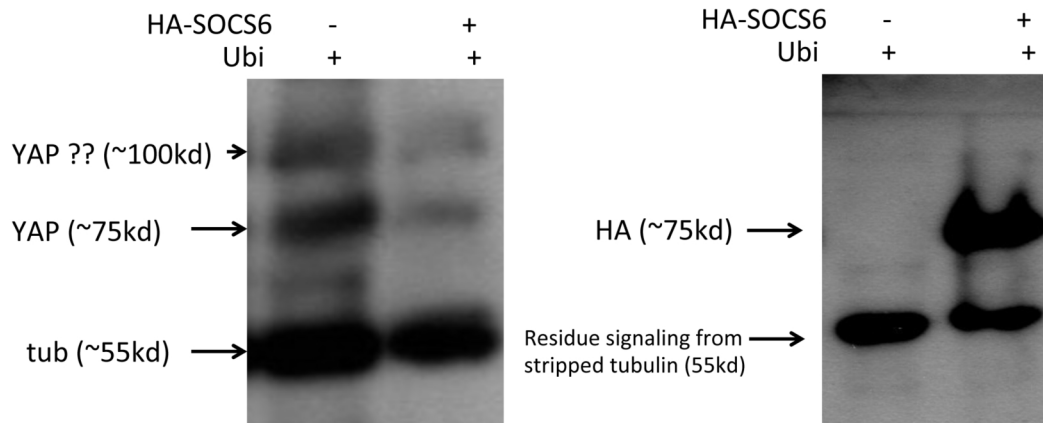

Fig 4D

FLAG IP (rabbit anti-FLAG), membrane probed with anti-HA (rabbit)

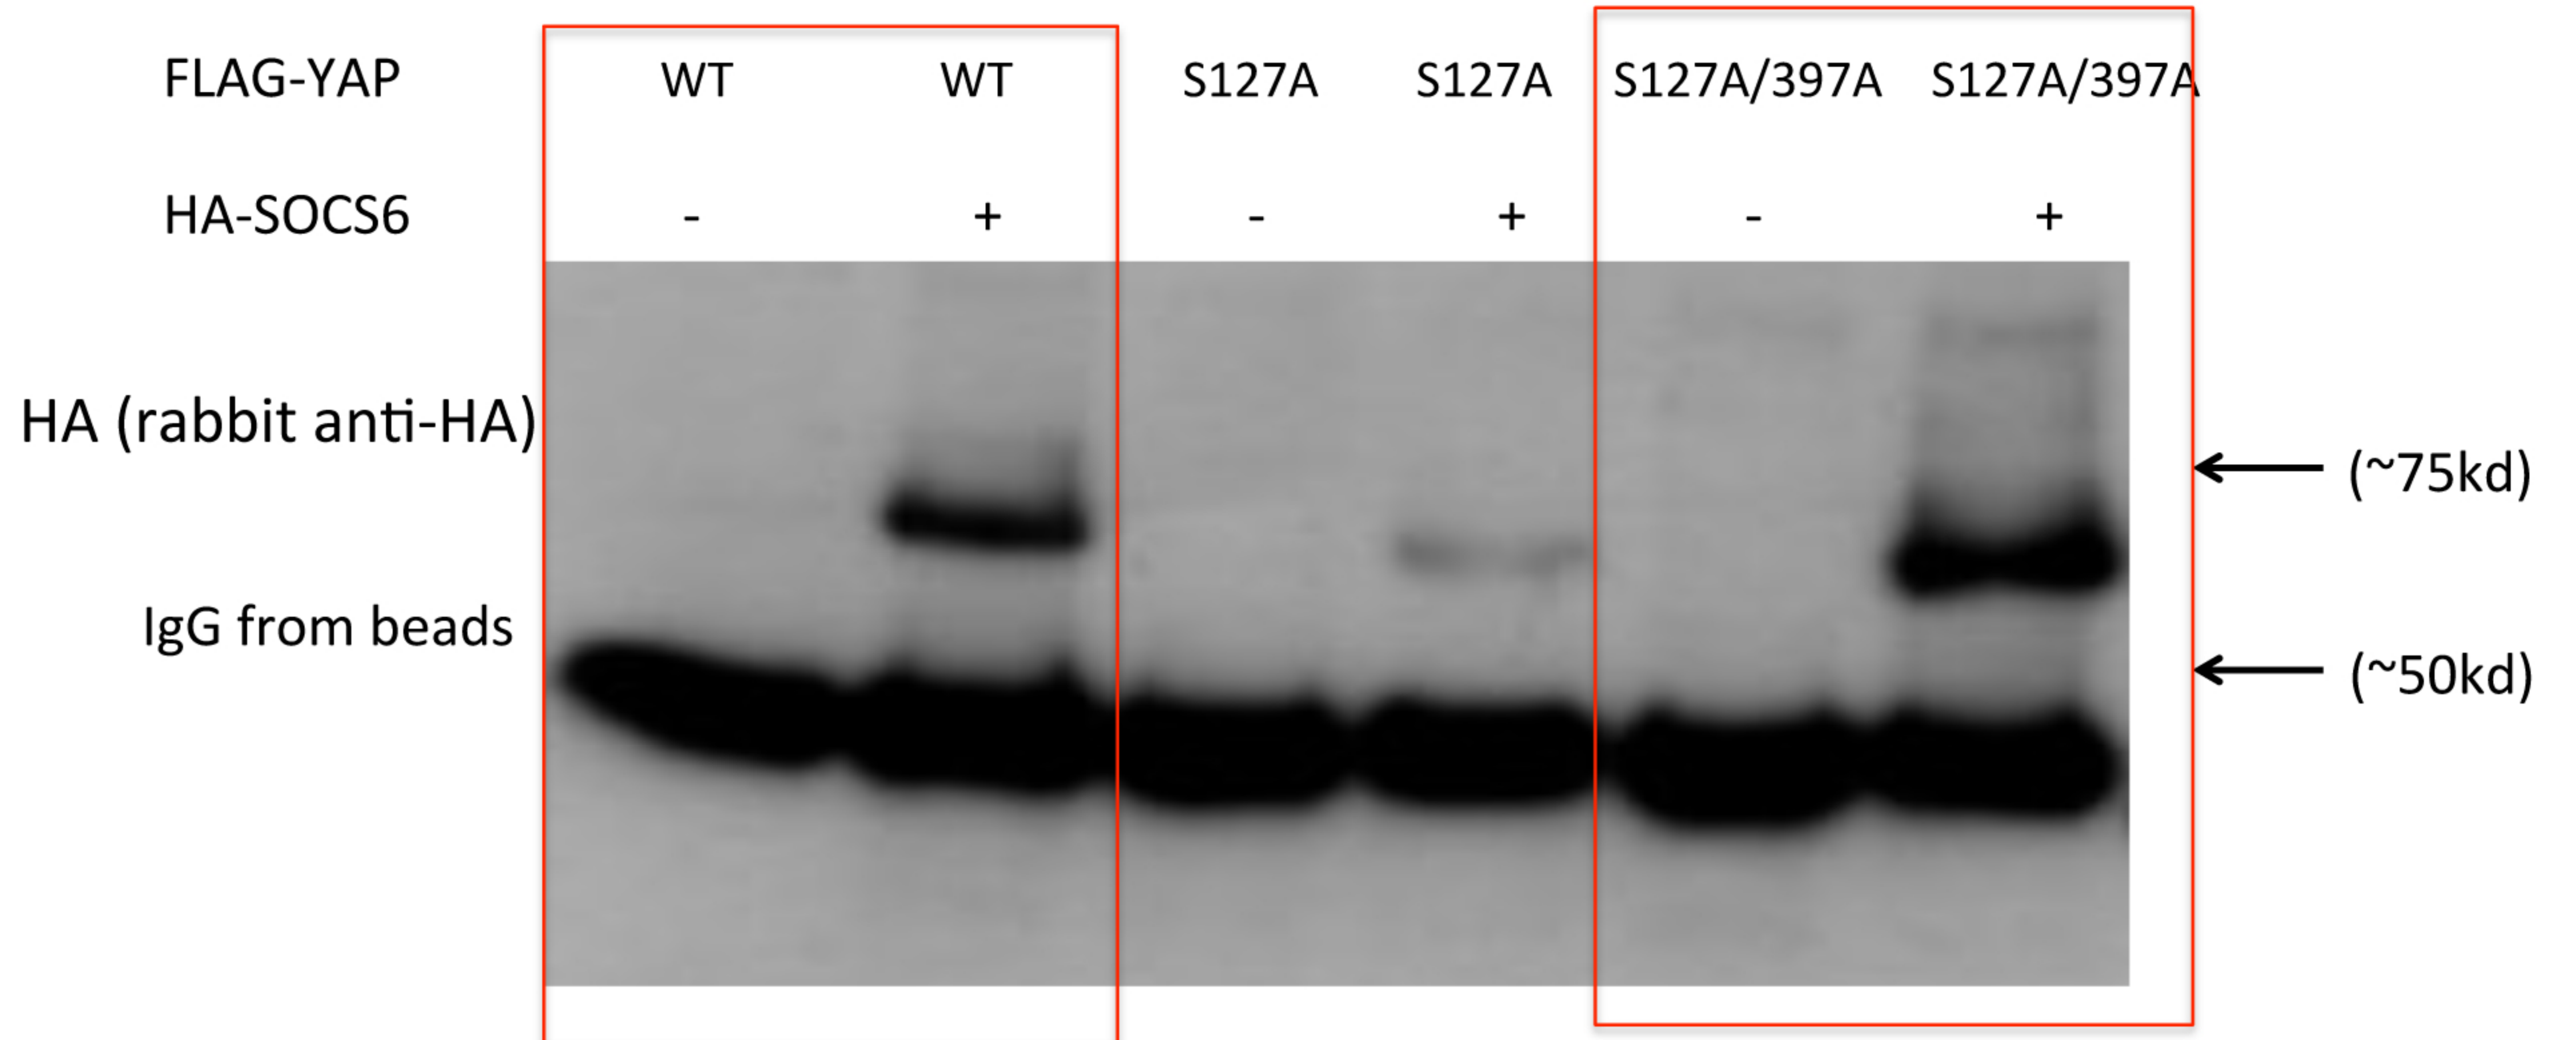

FLAG IP : Membrane probed with anti-FLAG (rabbit)

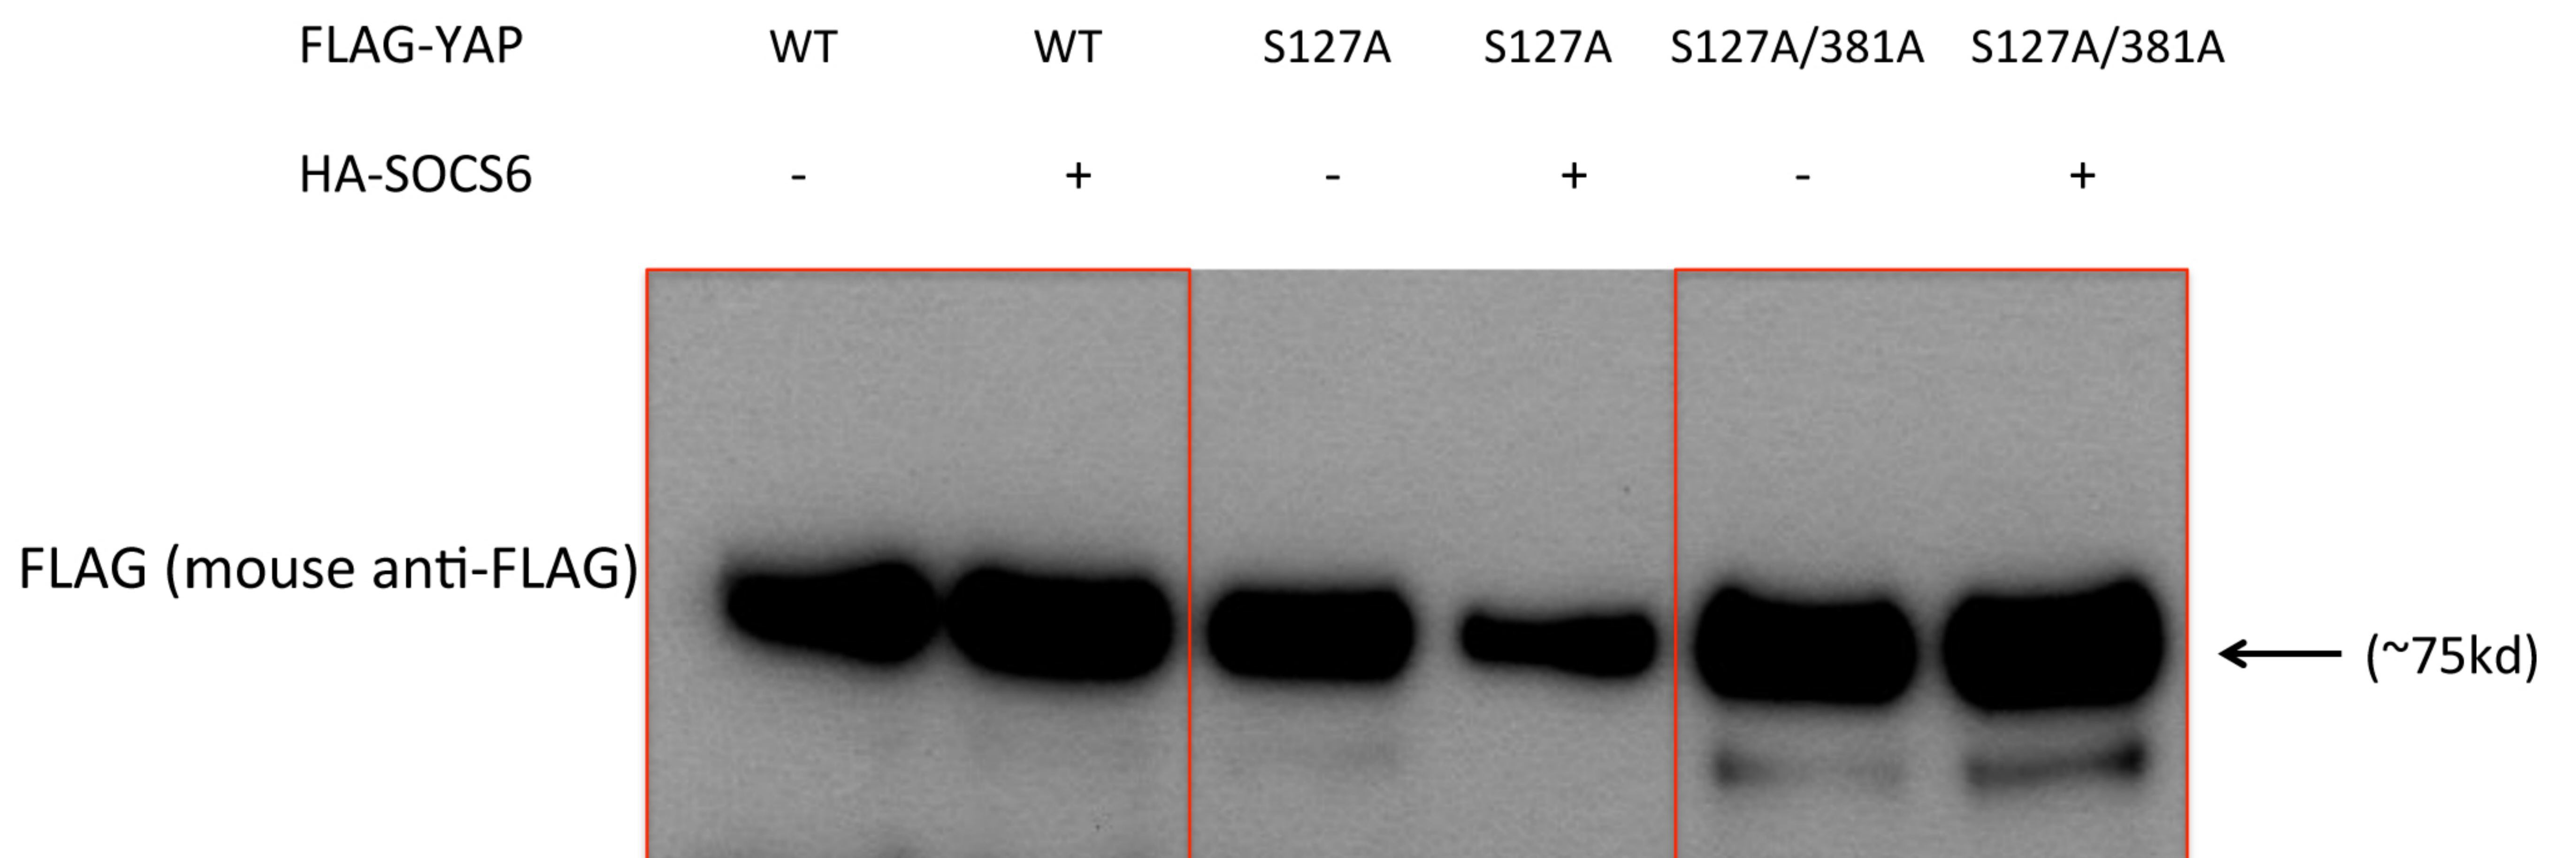

Fig 4D

Inputs (independent membranes)

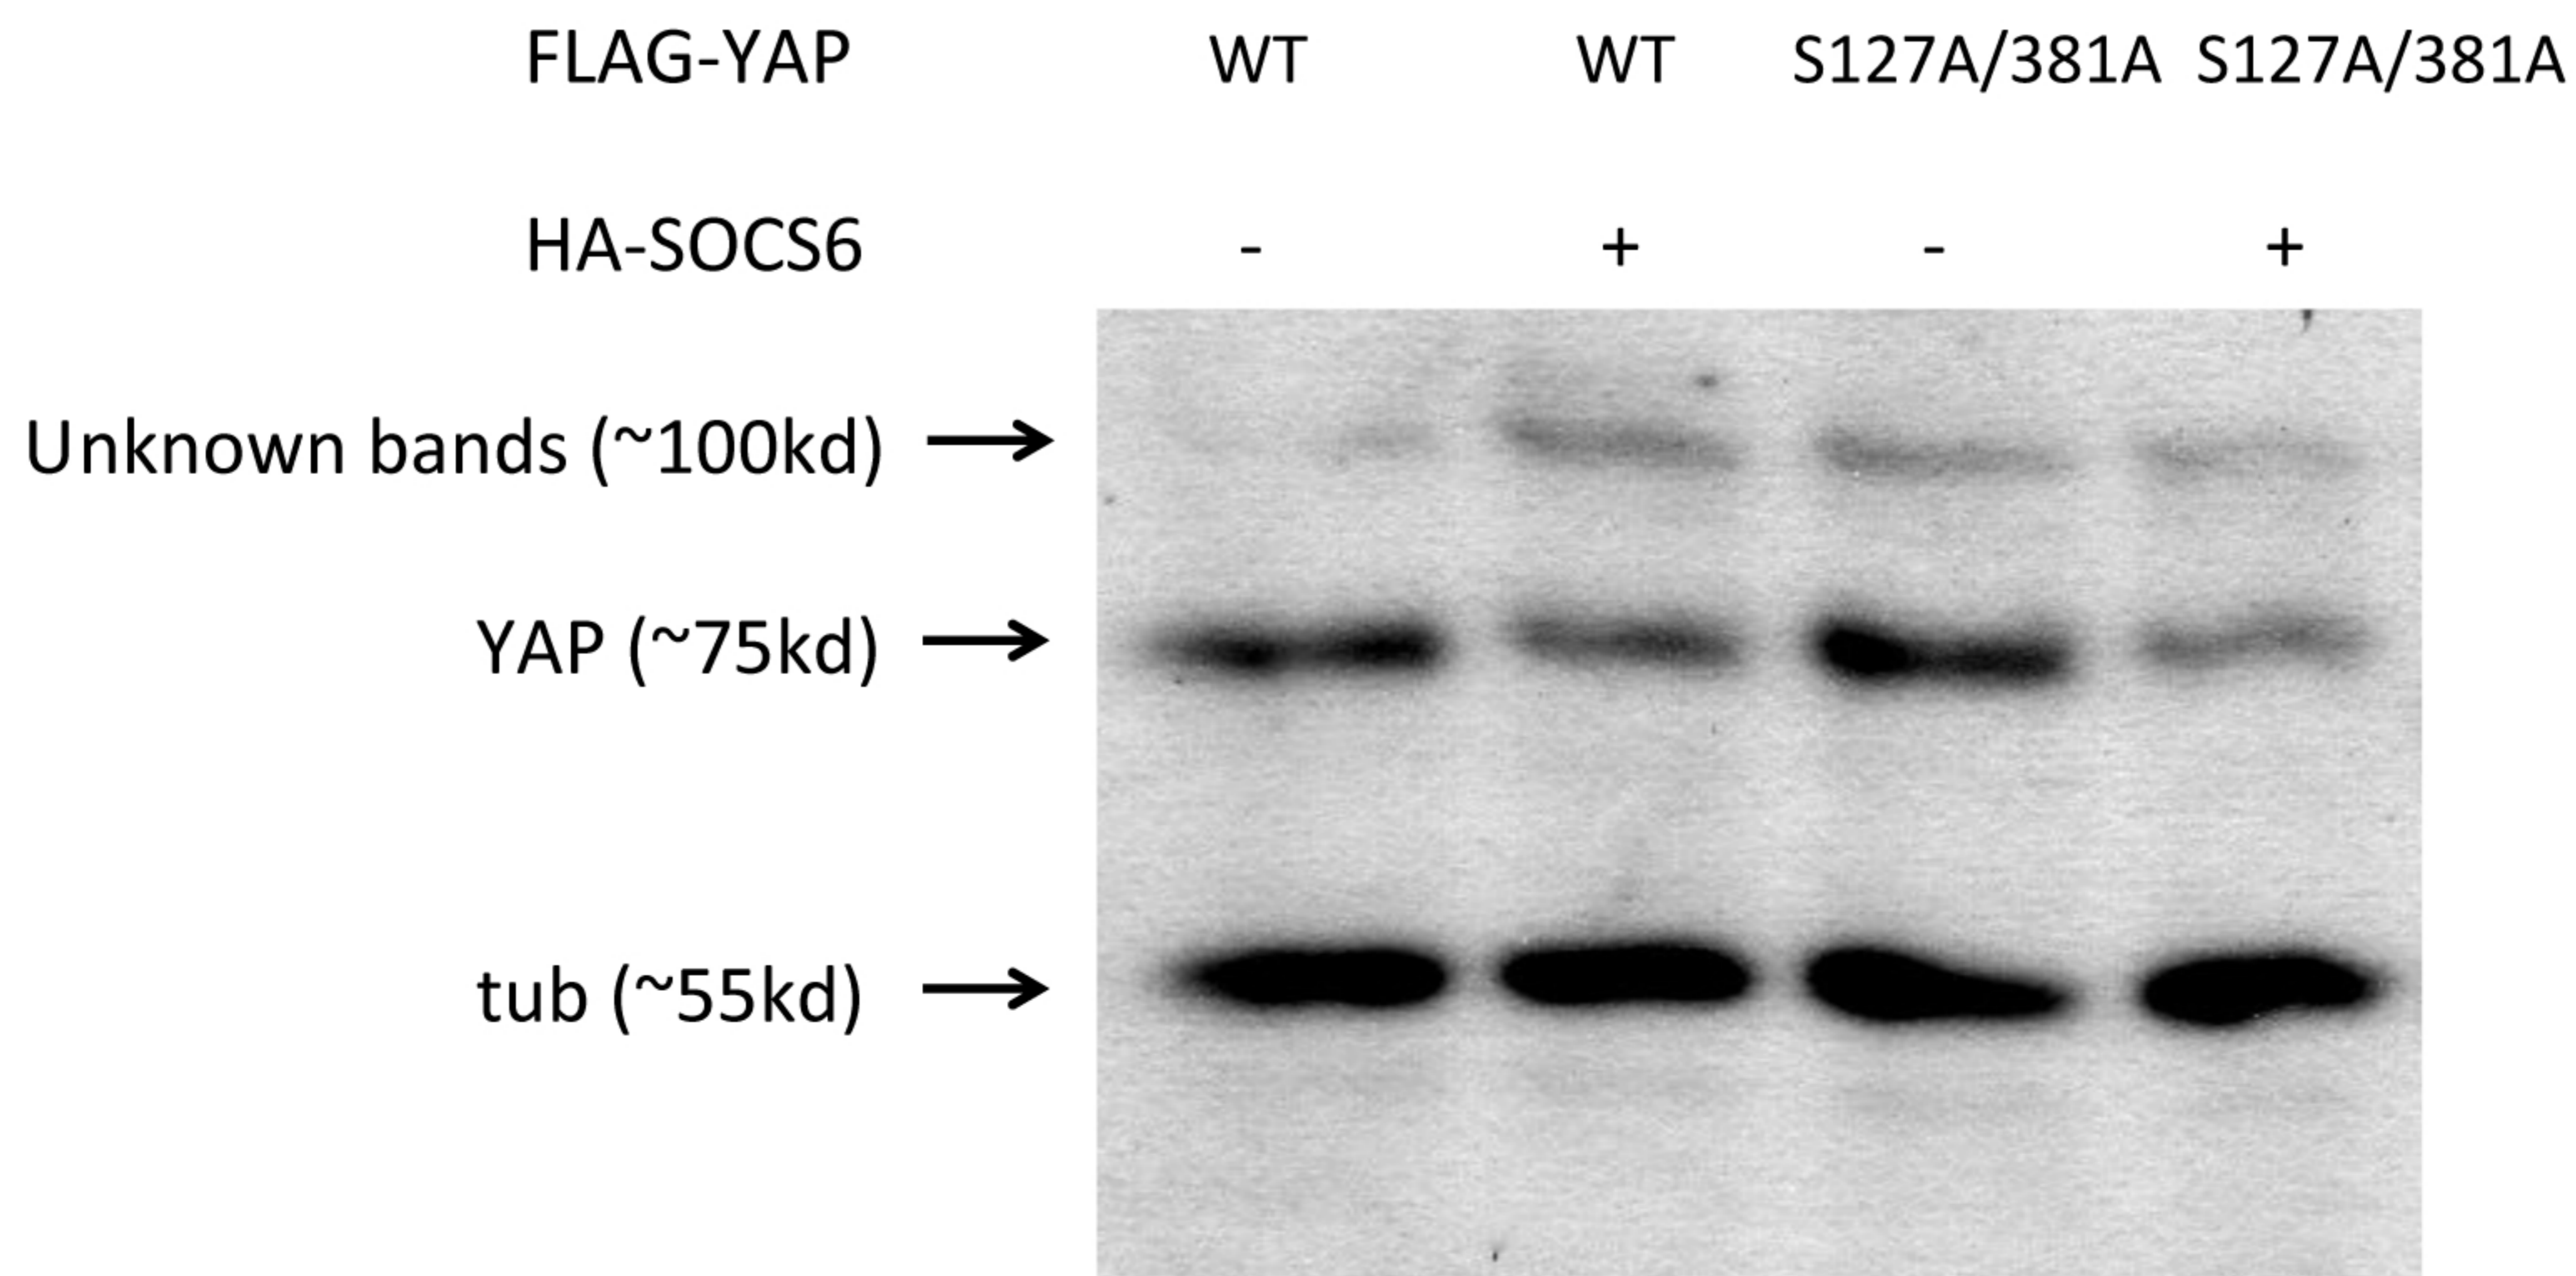

Fig 4E

Antibody used :

1. Rabbit anti-c-myc tag
2. Rabbit anti-SOCS6

First probed for c-myc-ubi

then stripped and probed with FLAG

After another stripping ,  
probed for SOCS6 (20 min exposure)

IgG →  
From beads

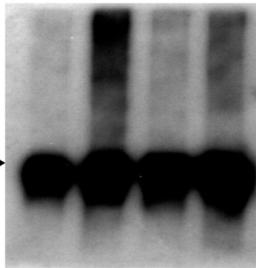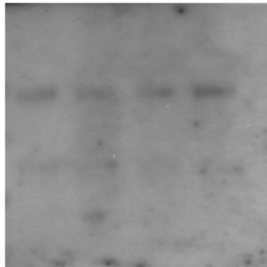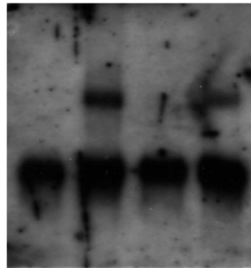

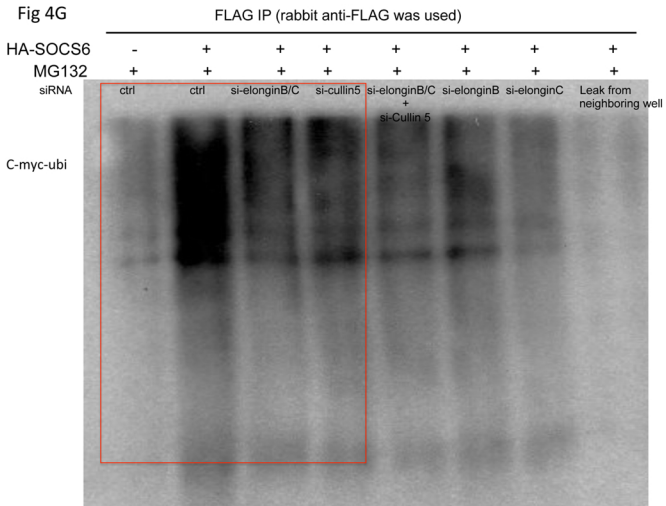

**Fig 4G** Antibody used after stripping : mouse anti-FLAG, in this exp, beads were removed from supernatant by centrifugation

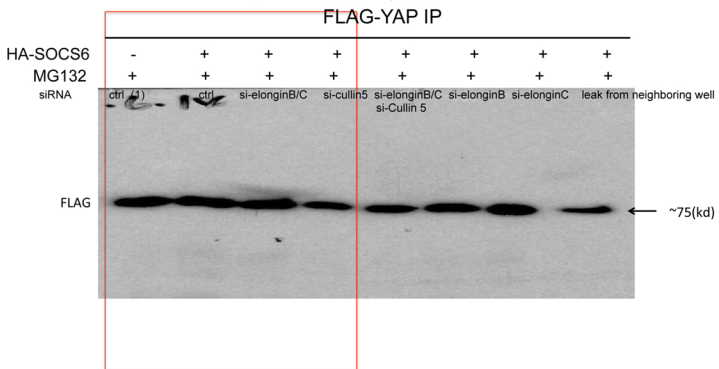

**Fig 4G** Antibody used after stripping: rabbit anti-SOCS6, in this exp, beads were removed from supernatant by centrifugation

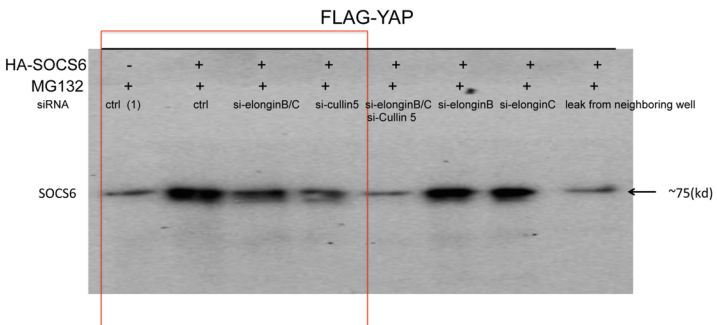

Supplement: embj0033-2447-sd4.pdf [file embj0033-2447-sd4.pdf]
