# Supplementary material for: Opposing activities of the Ras and Hippo pathways converge on regulation of YAP protein turnover
Source: PubMed Central journal article supplement (PMC4283404; doi:10.15252/embj.201489385), 2014-09-01

Fig 3A short exposure

Antibody used: rabbit anti-YAP  
Mouse anti-tubulin

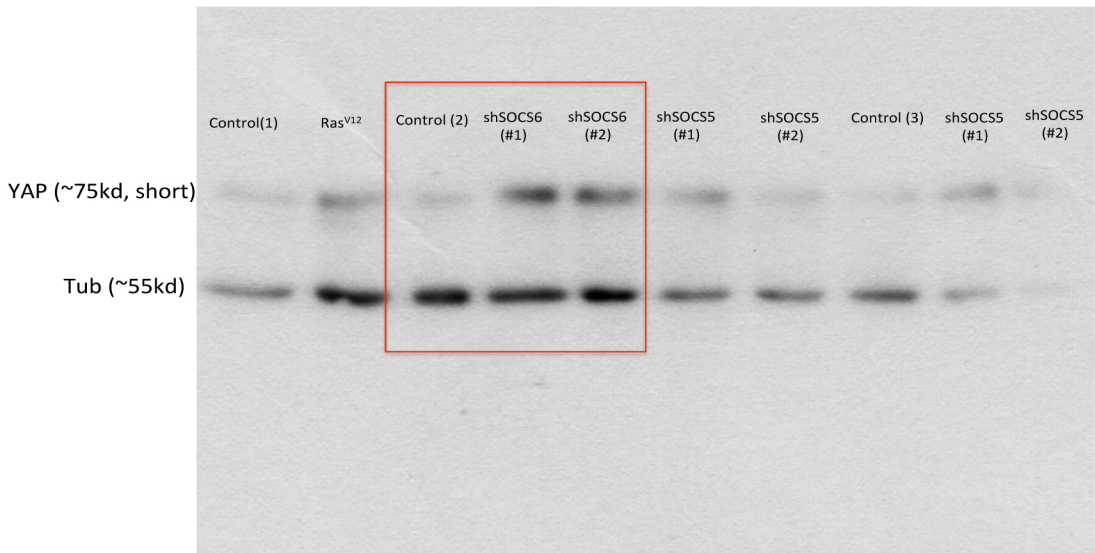

Fig 3A long exposure

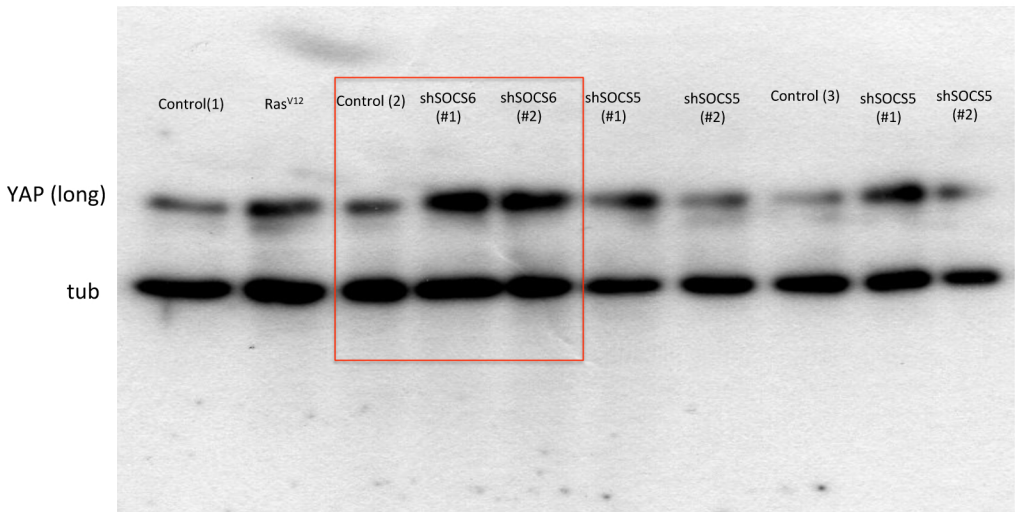

Fig 3A

Membrane was probed with rabbit anti-SOCS6  
and mouse anti-tubulin together

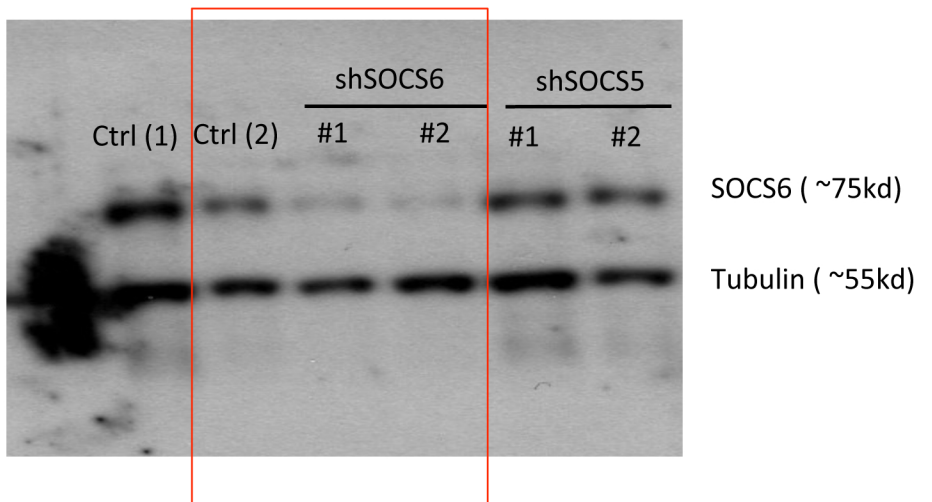

Supplement: embj0033-2447-sd3.pdf [file embj0033-2447-sd3.pdf]
