# Supplementary material for: Opposing activities of the Ras and Hippo pathways converge on regulation of YAP protein turnover
Source: PubMed Central journal article supplement (PMC4283404; doi:10.15252/embj.201489385), 2014-09-01

Socs6

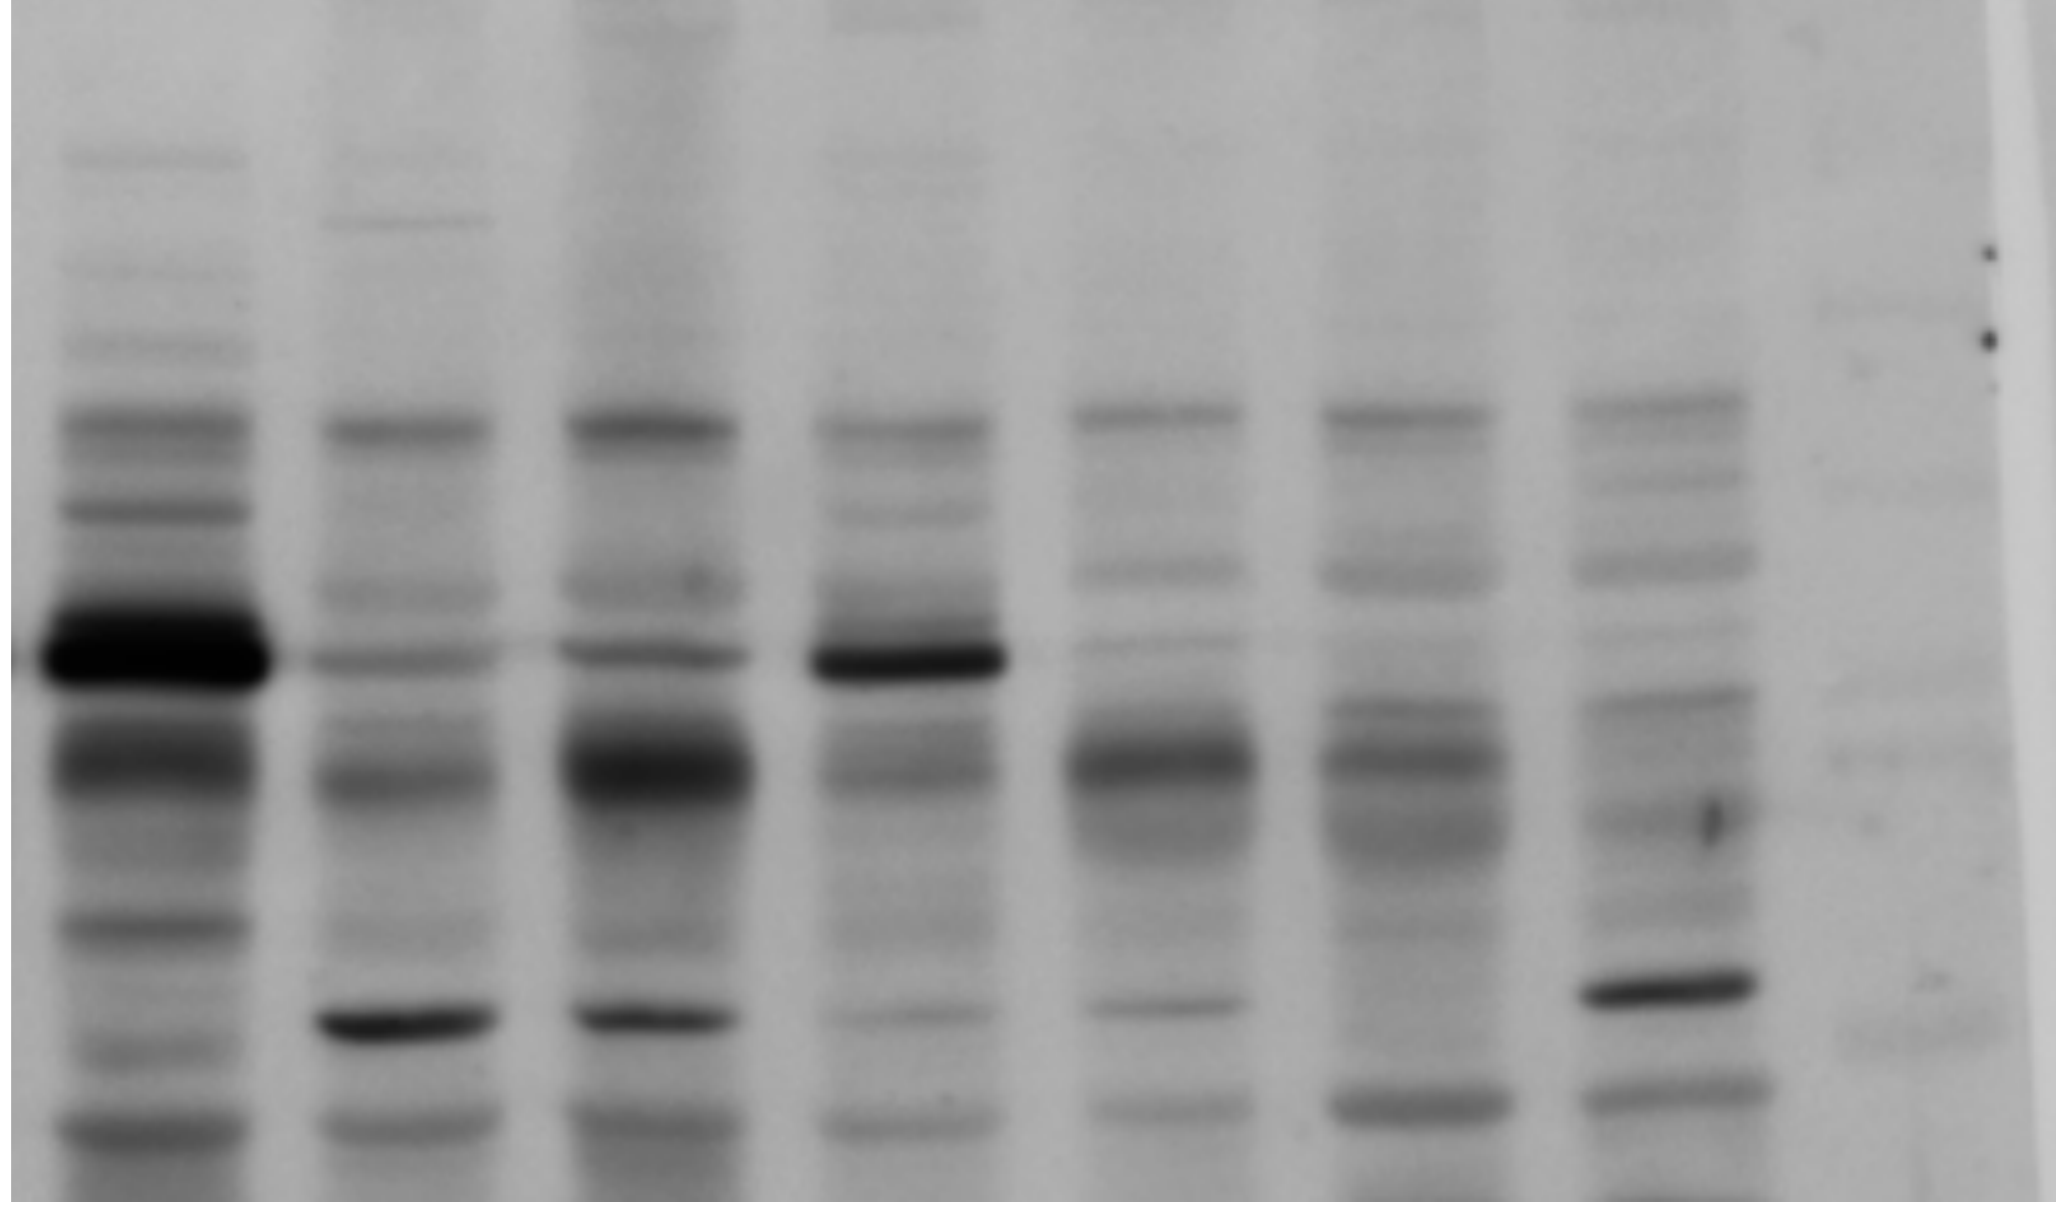

BJ

DLD1

HCT116

SW48

SW480

Colo320

SW620

BJ

DLD1

HCT116

SW48

SW480

Colo320

SW620

Actin

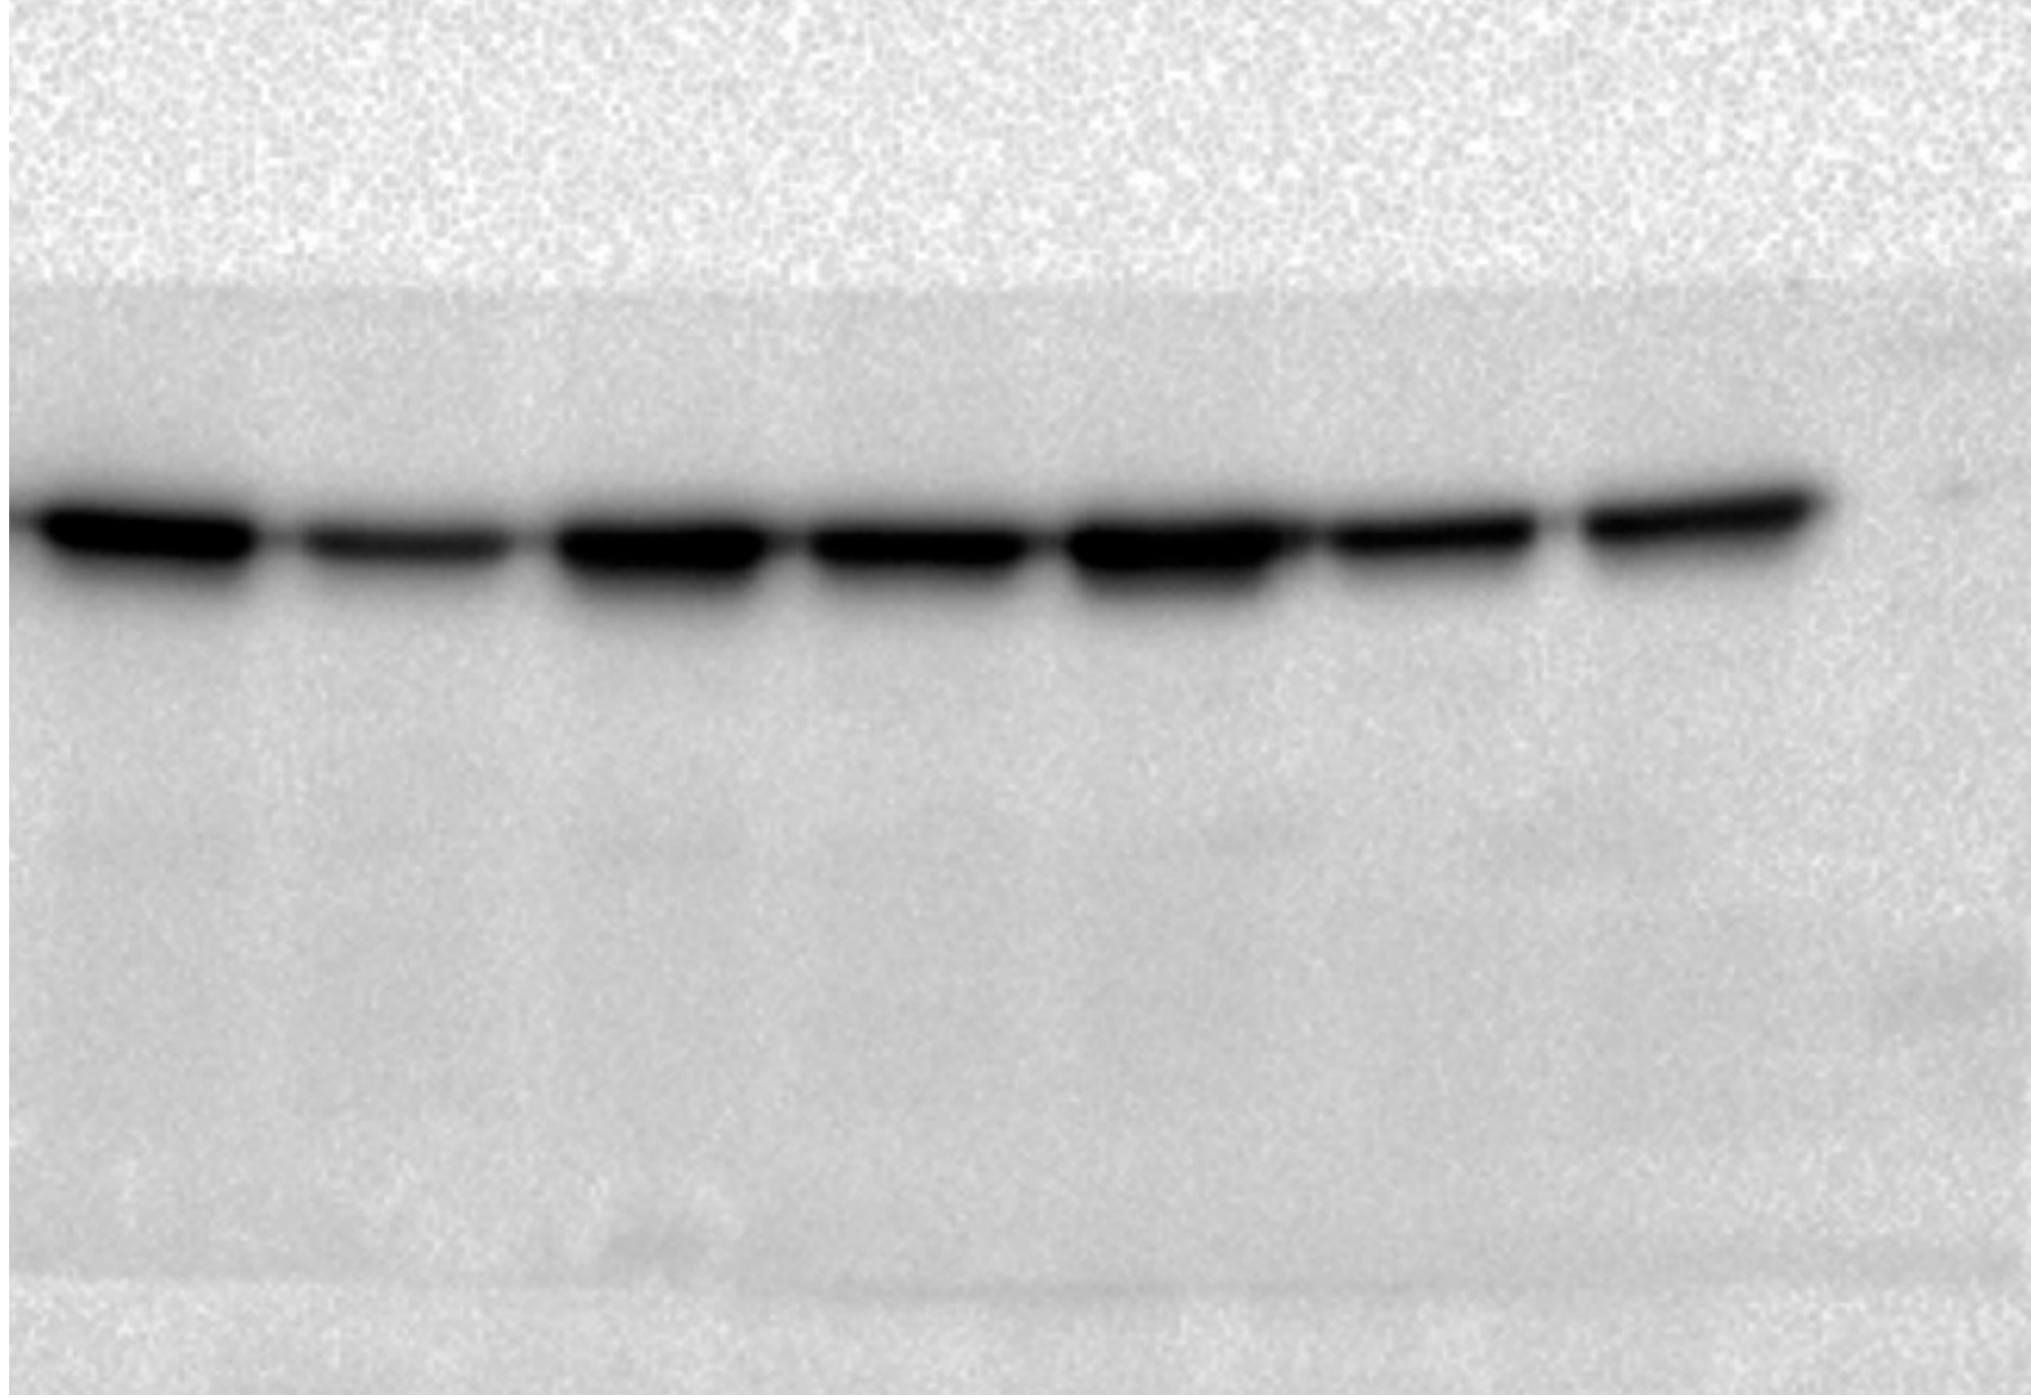

Socs6

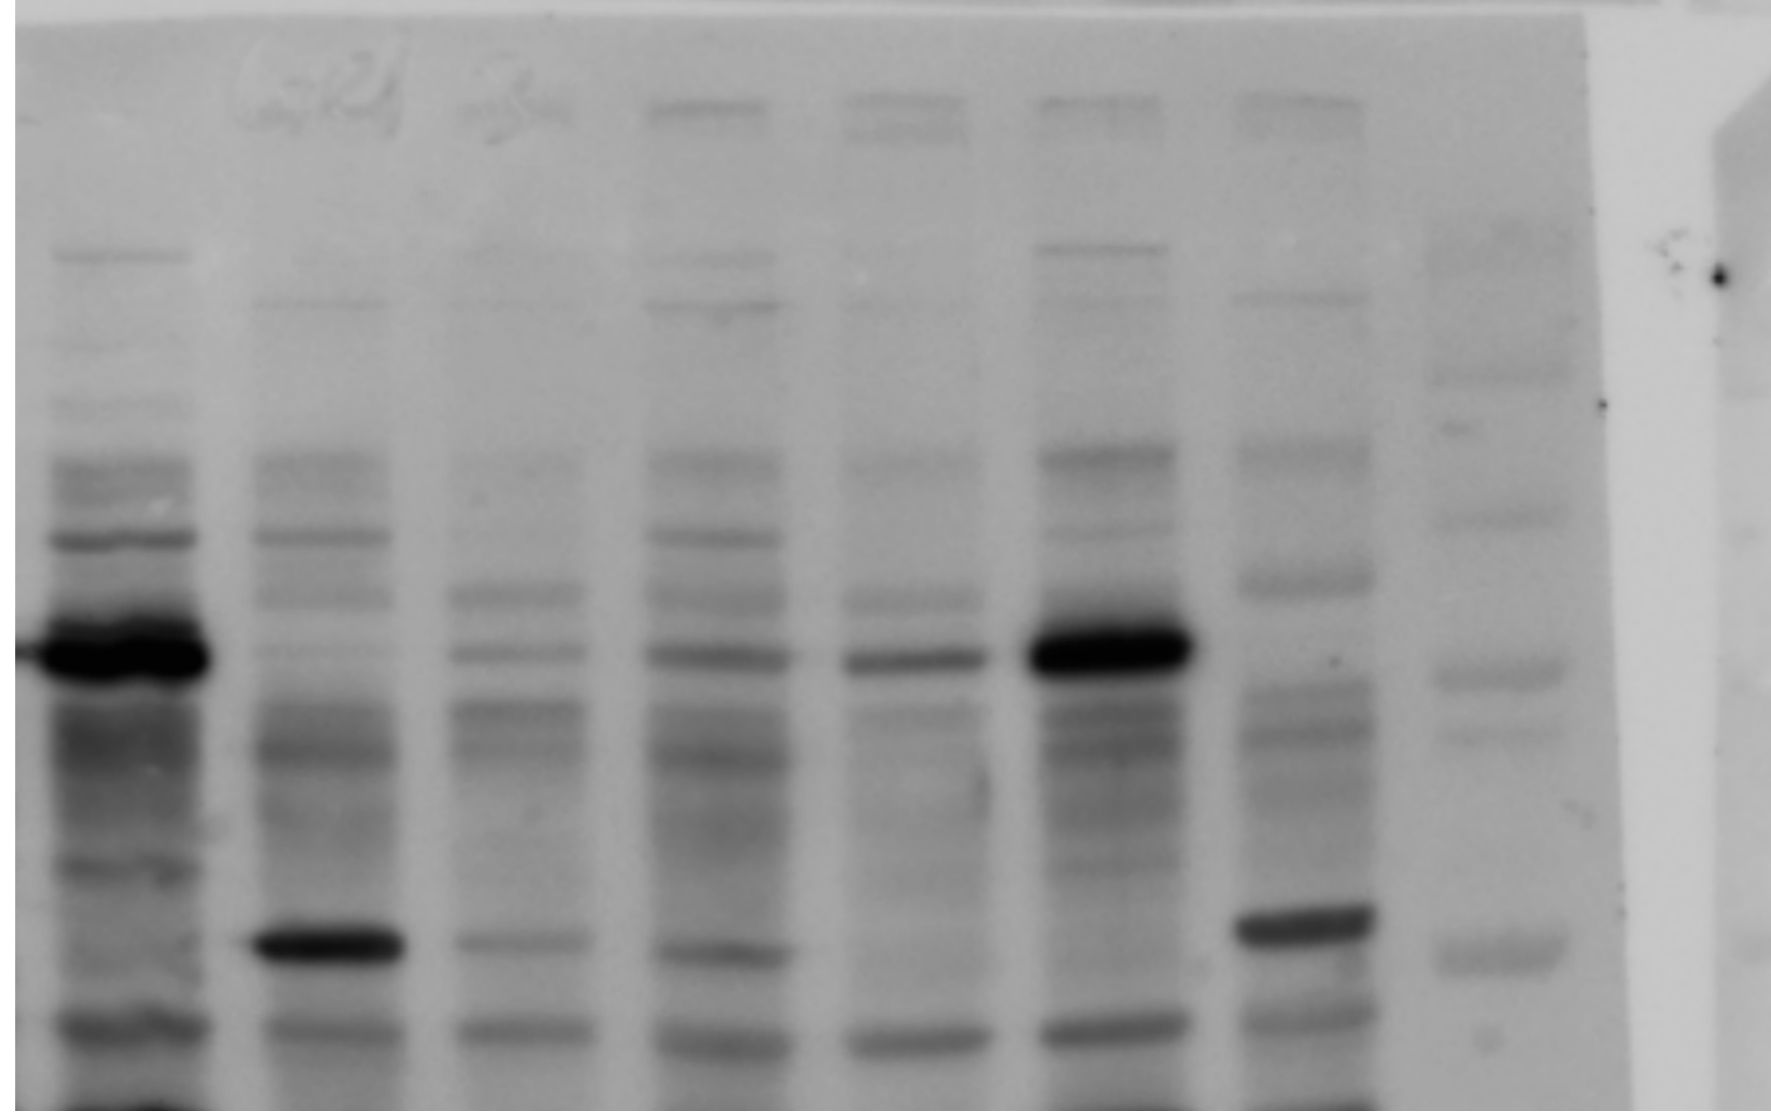

BJ

HT29

HT15

AGS

U20S

SAOS-2

MCF7

Marker

Actin

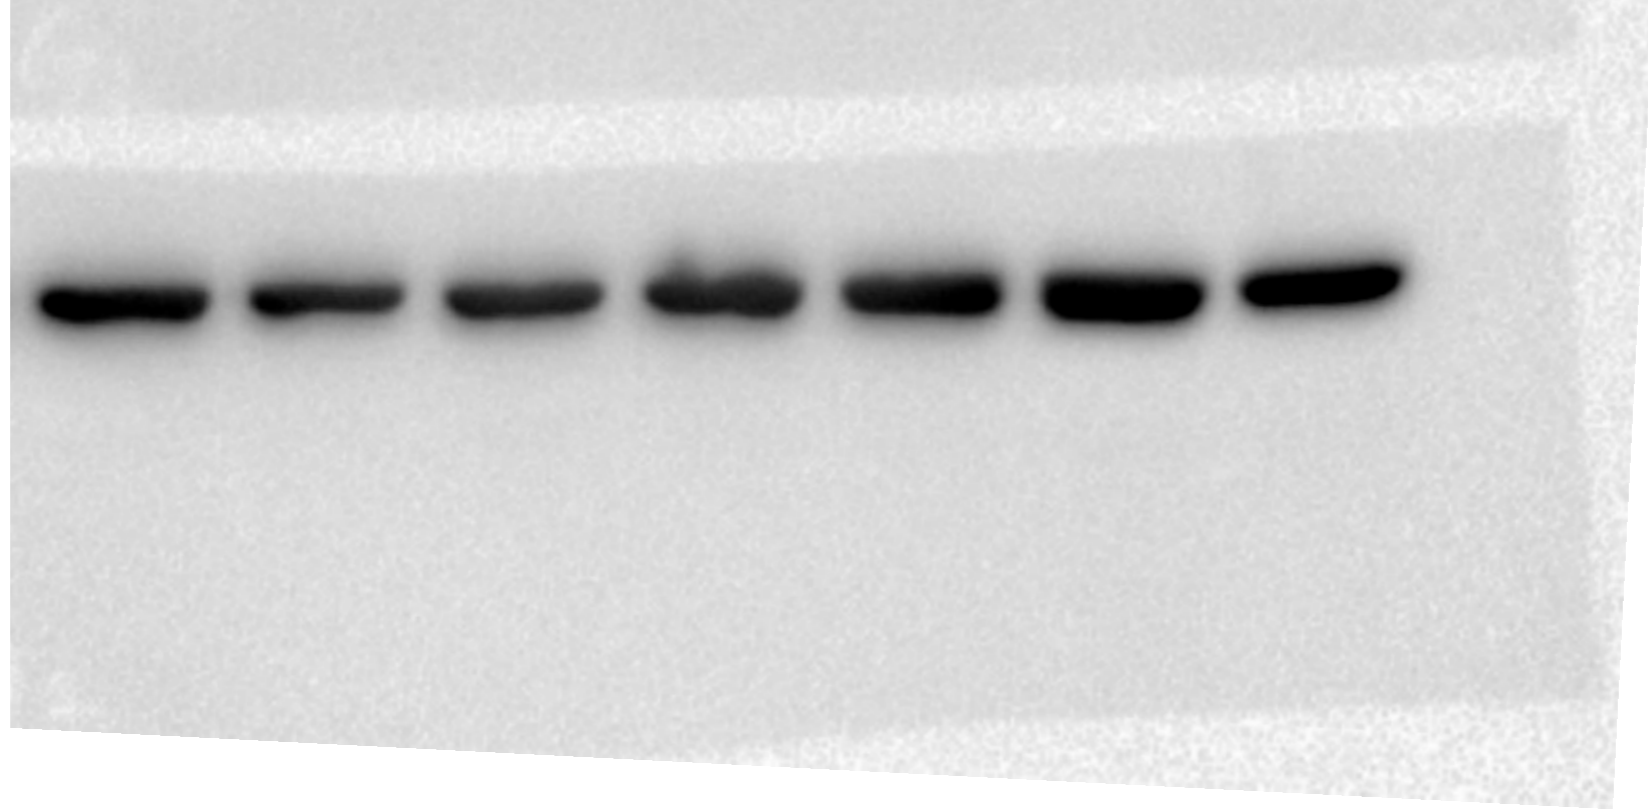

BJ

HT29

HT15

AGS

U2OS

SAOS-2

MCF7

Marker

Socs6

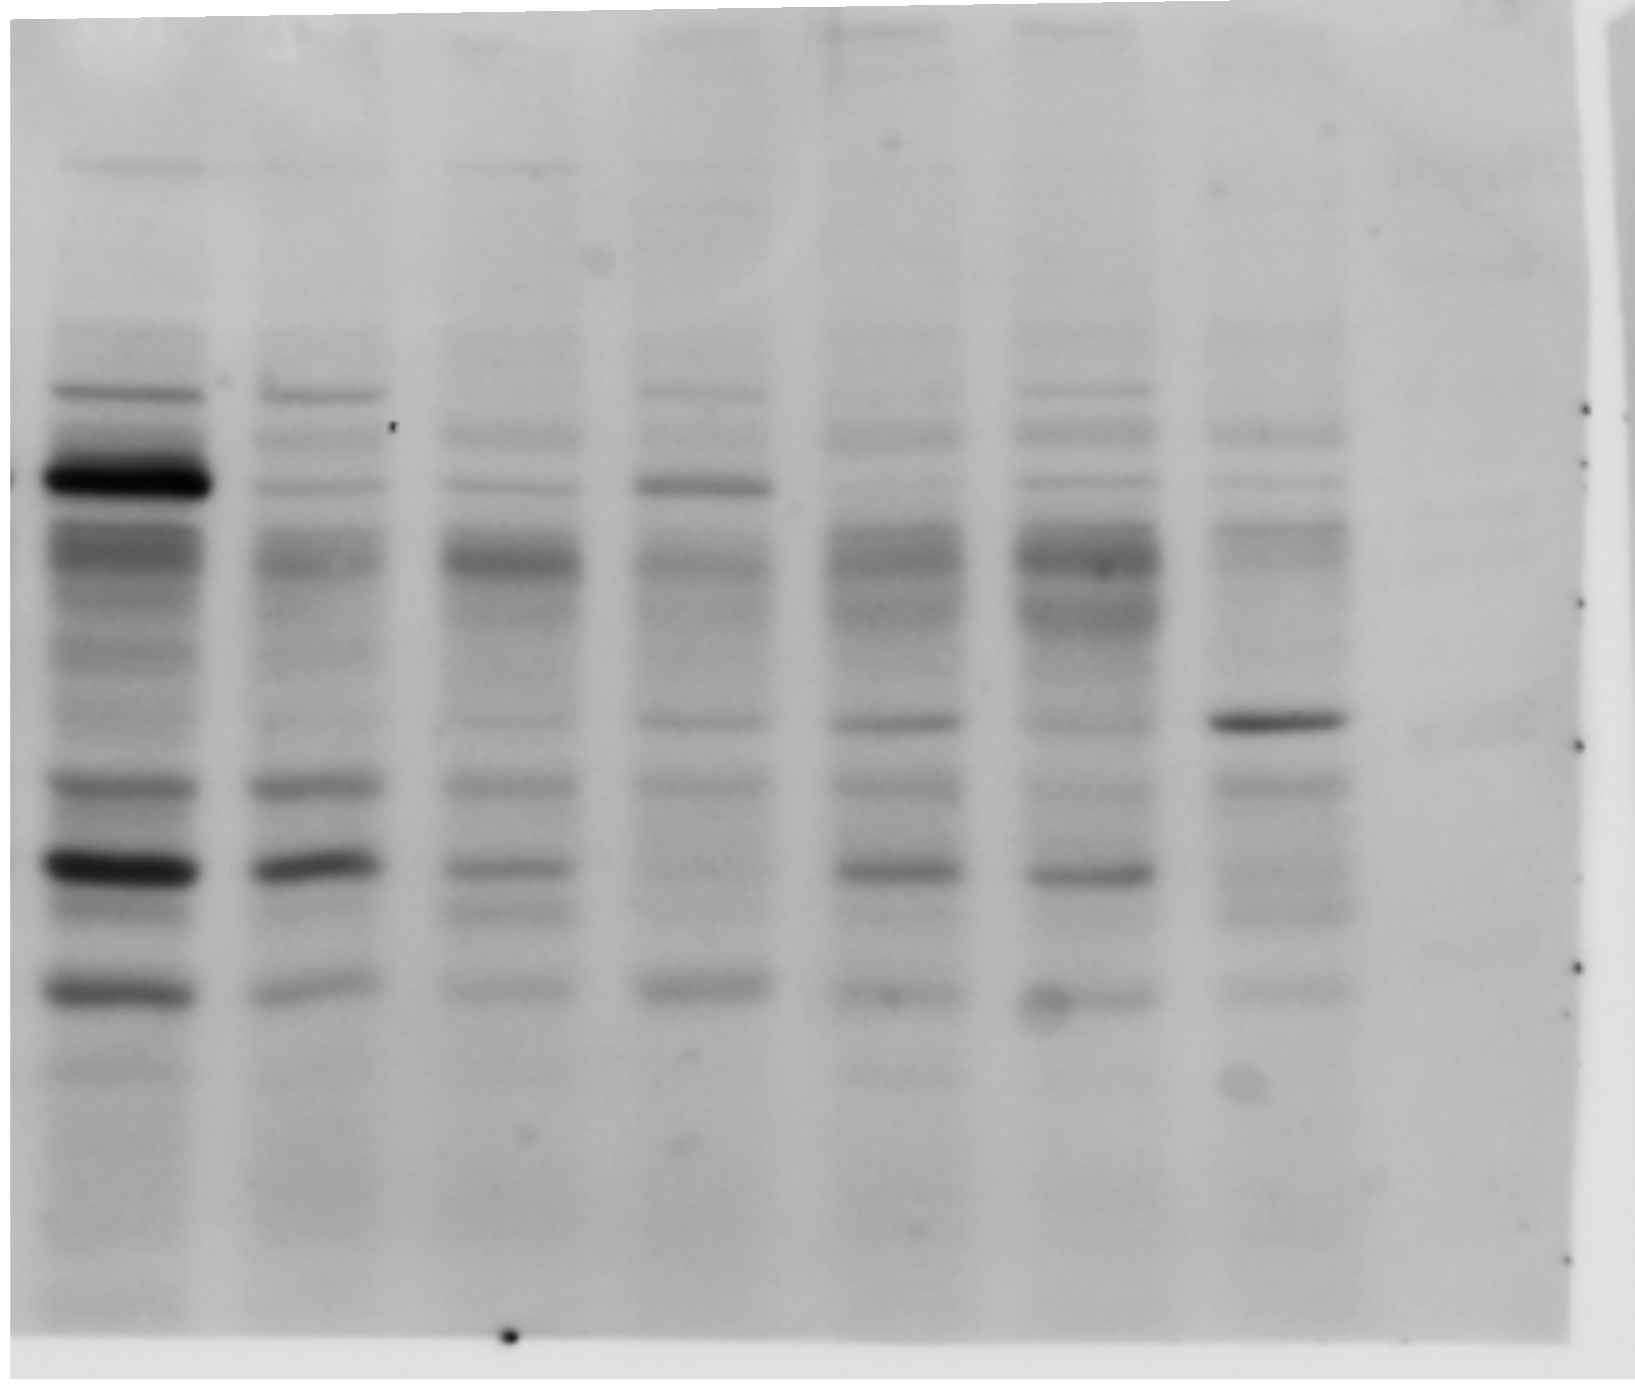

BJ

MDA-MB231

MDA-MB453

BT20

BT474

MDA-MB134

T47D

Actin

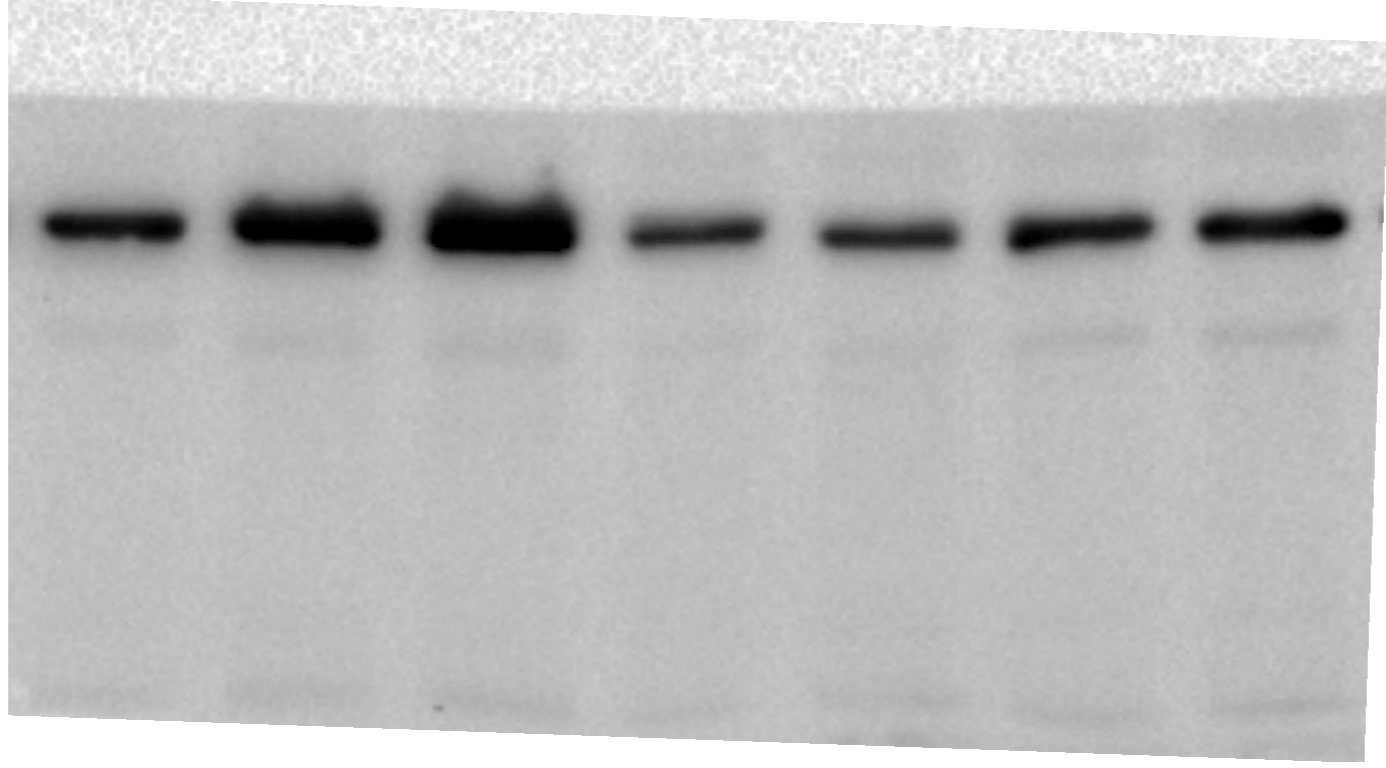

Socs6

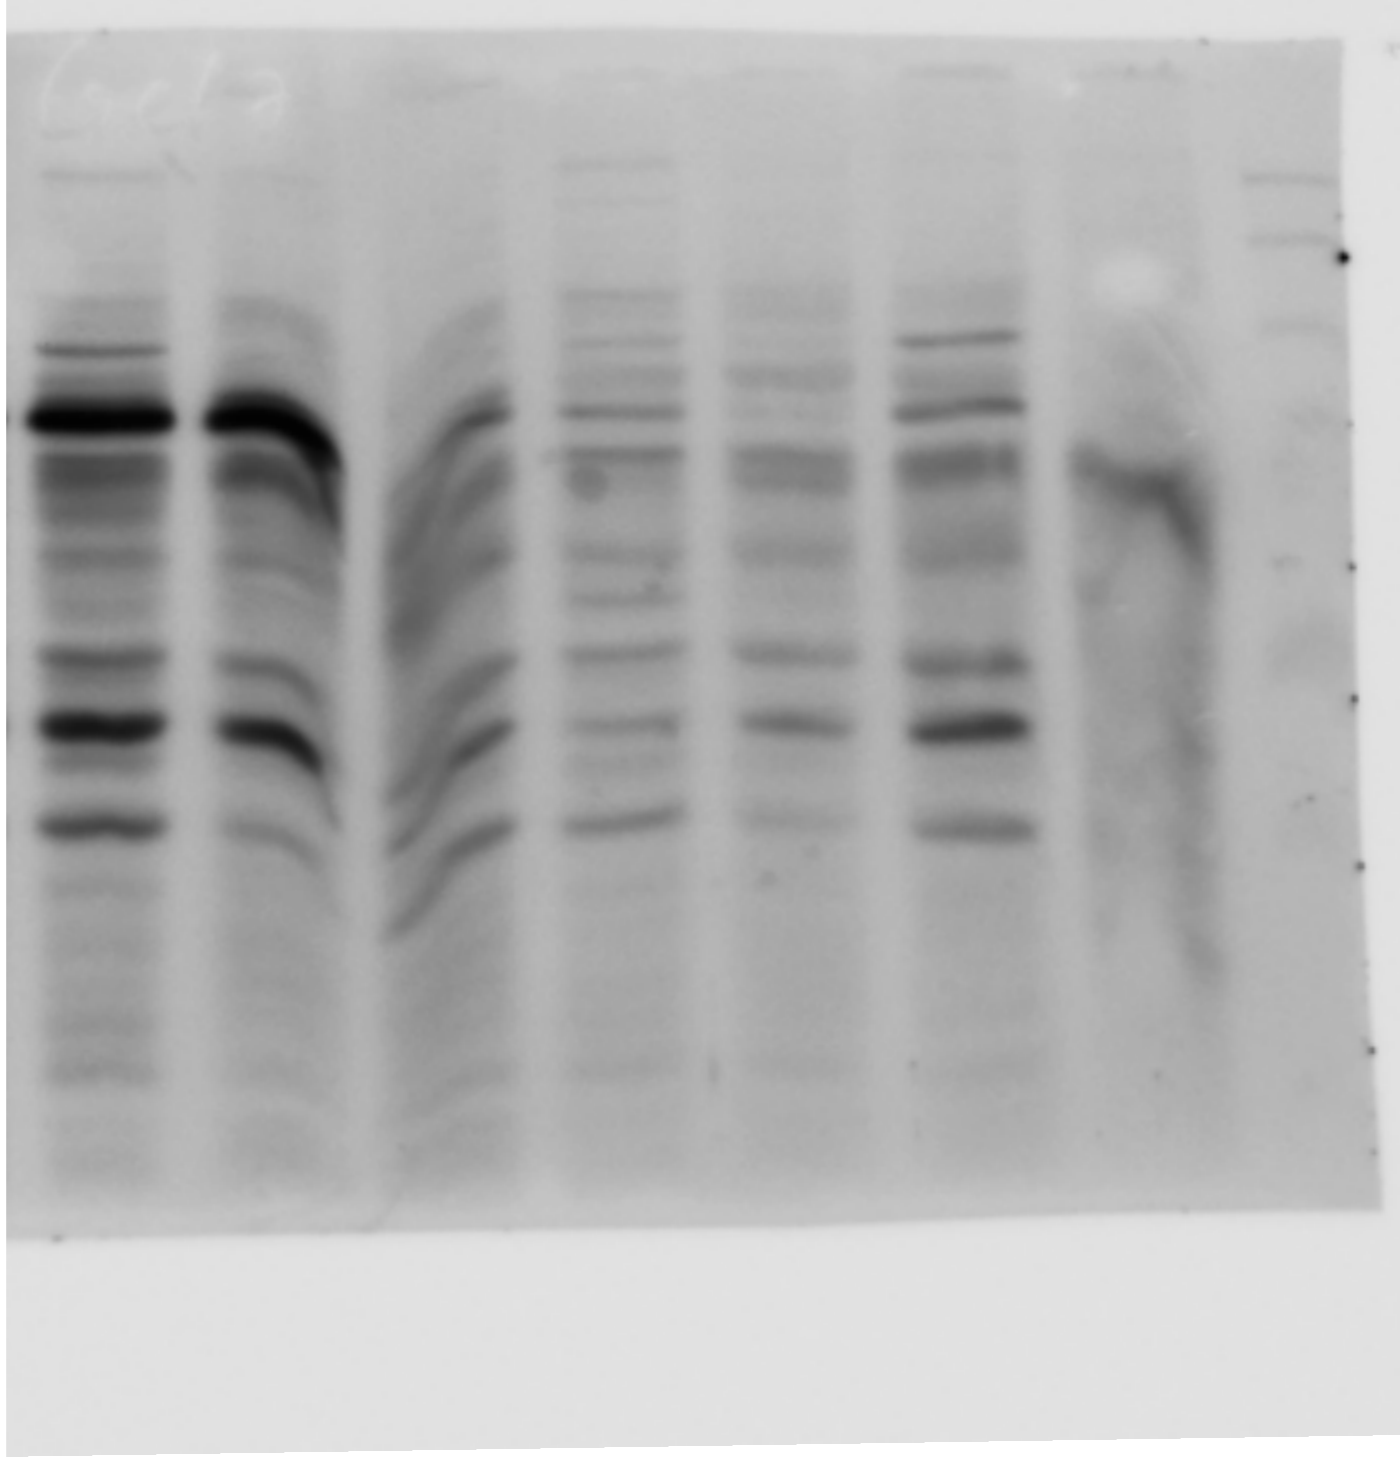

Actin

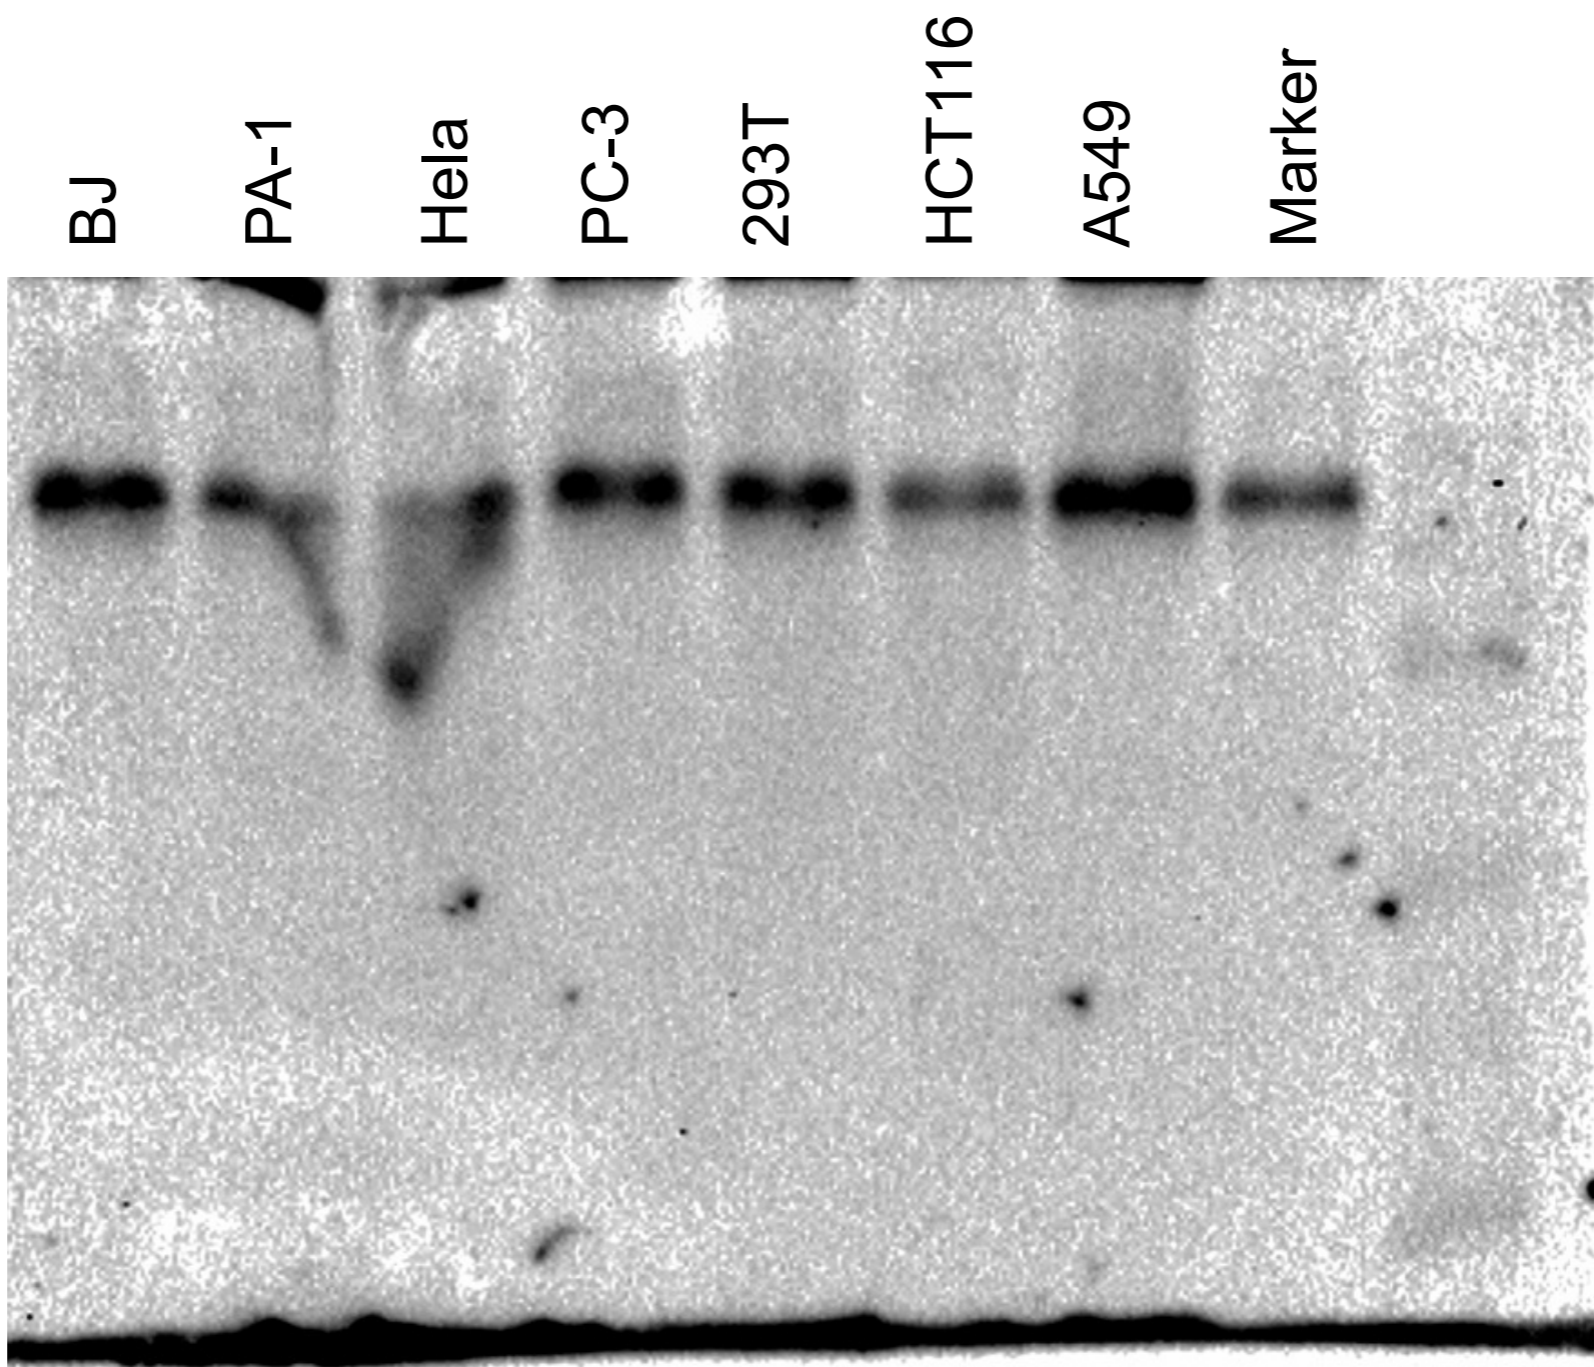

Supplement: embj0033-2447-sd5.pdf [file embj0033-2447-sd5.pdf]
