# Supplementary material for: Opposing activities of the Ras and Hippo pathways converge on regulation of YAP protein turnover
Source: PubMed Central journal article supplement (PMC4283404; doi:10.15252/embj.201489385), 2014-09-01
Supplement: embj0033-2447-sd6.pdf [file embj0033-2447-sd6.pdf]

YAP

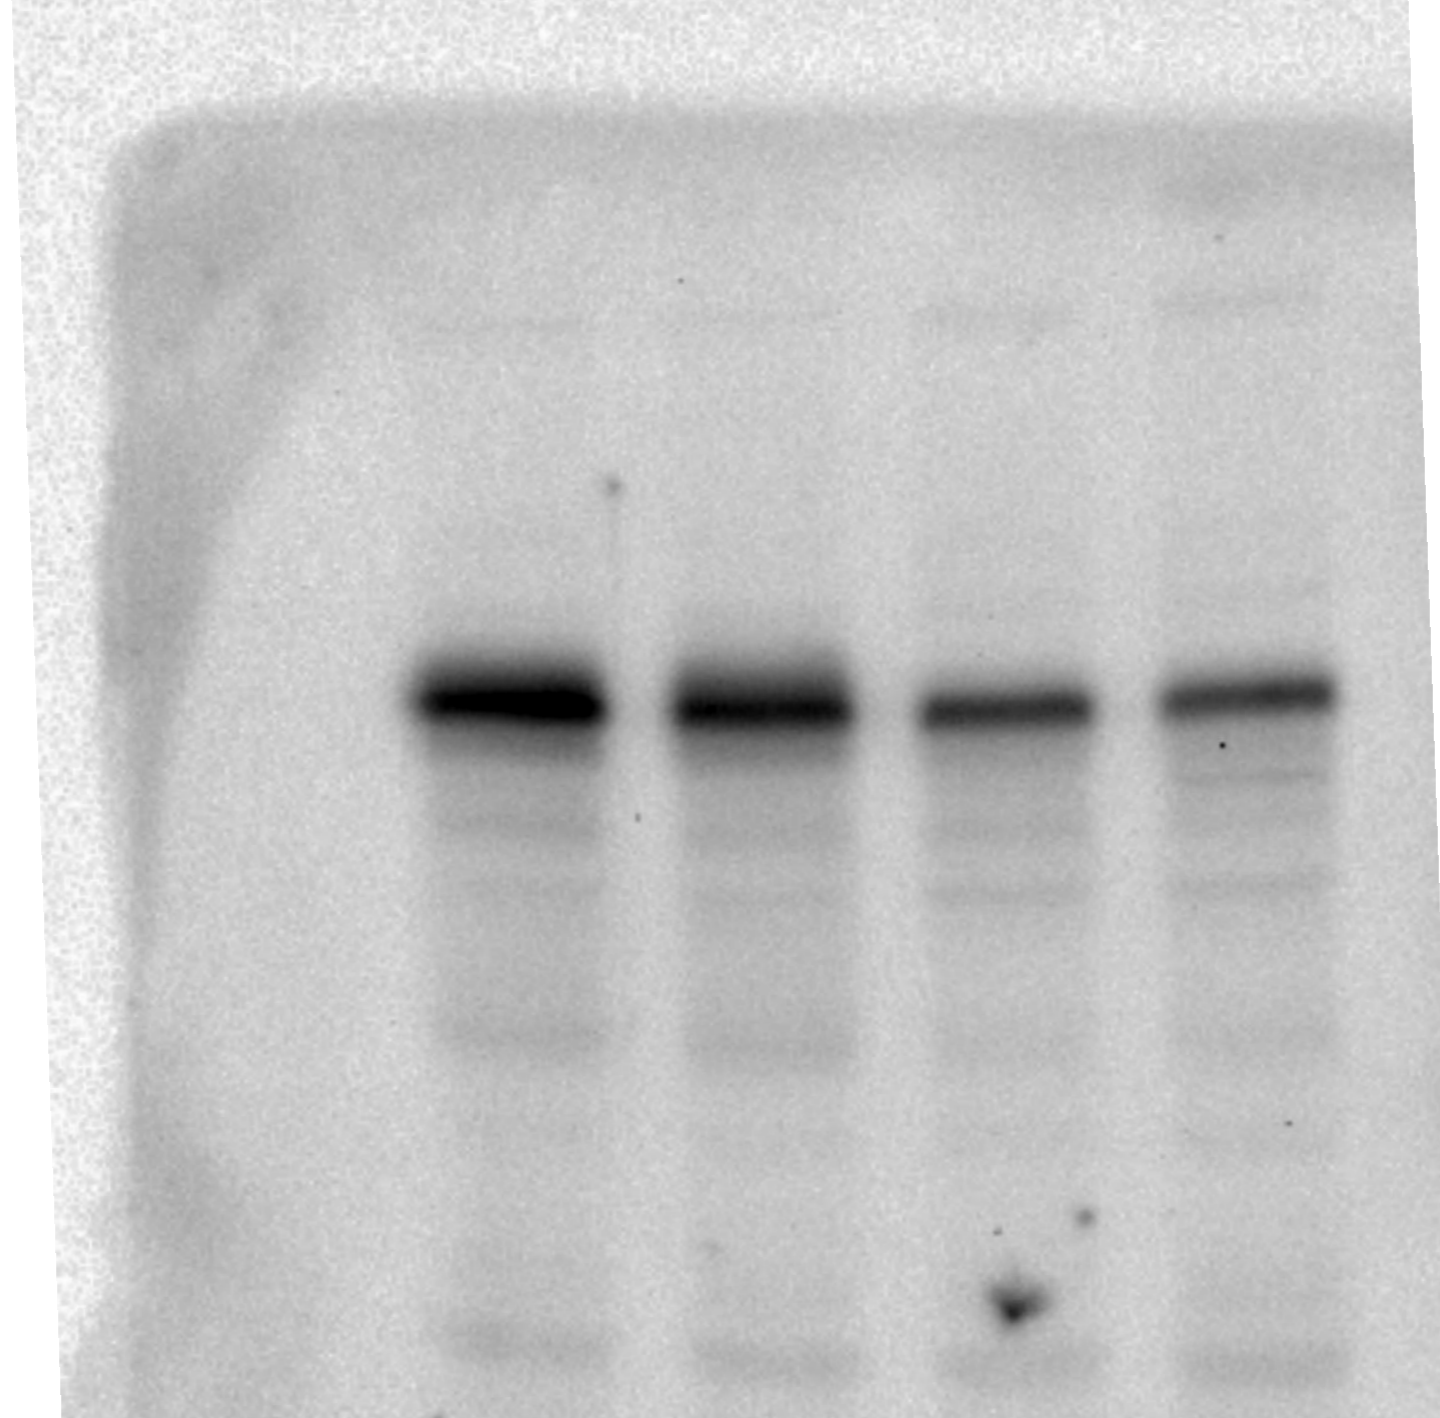

Cells: BJ<sup>T</sup>/p53kd/p16kd/ST

Control

Tead2 DN

sh-YAP#1

sh-YAP#2

AREG

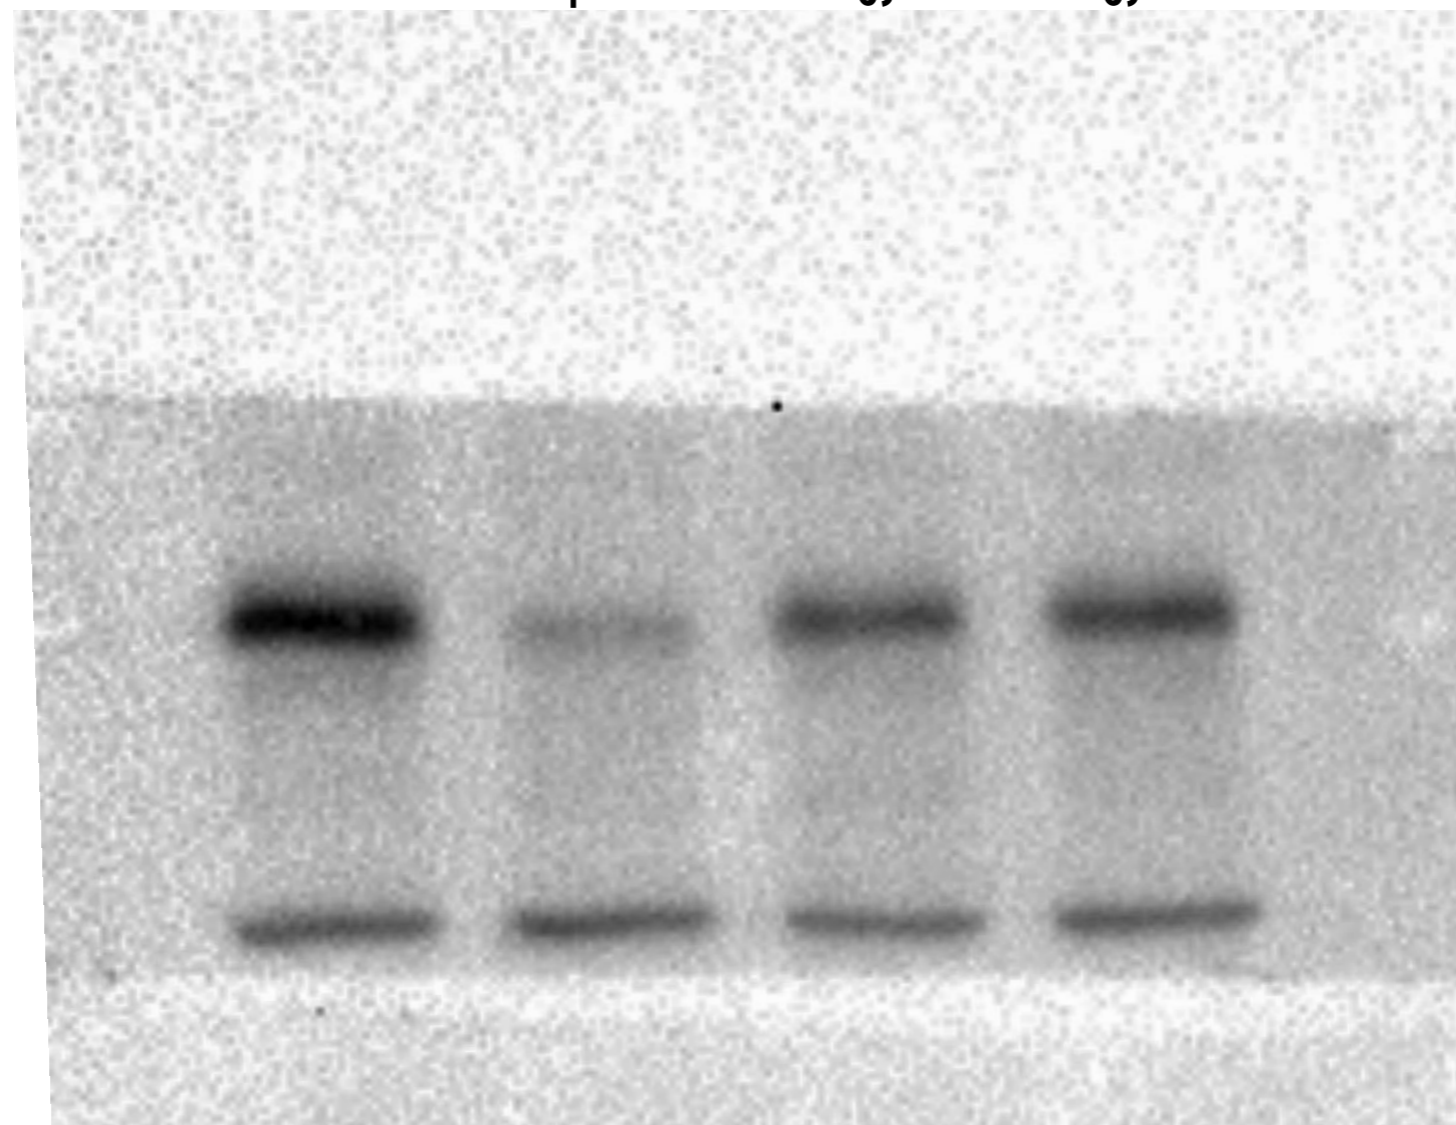

Control

Tead2 DN

sh-YAP#1

sh-YAP#2

Cells: BJ<sup>T</sup>/p53kd/p16kd/ST

Control  
Tead2 DN  
sh-YAP#1  
sh-YAP#2

Actin

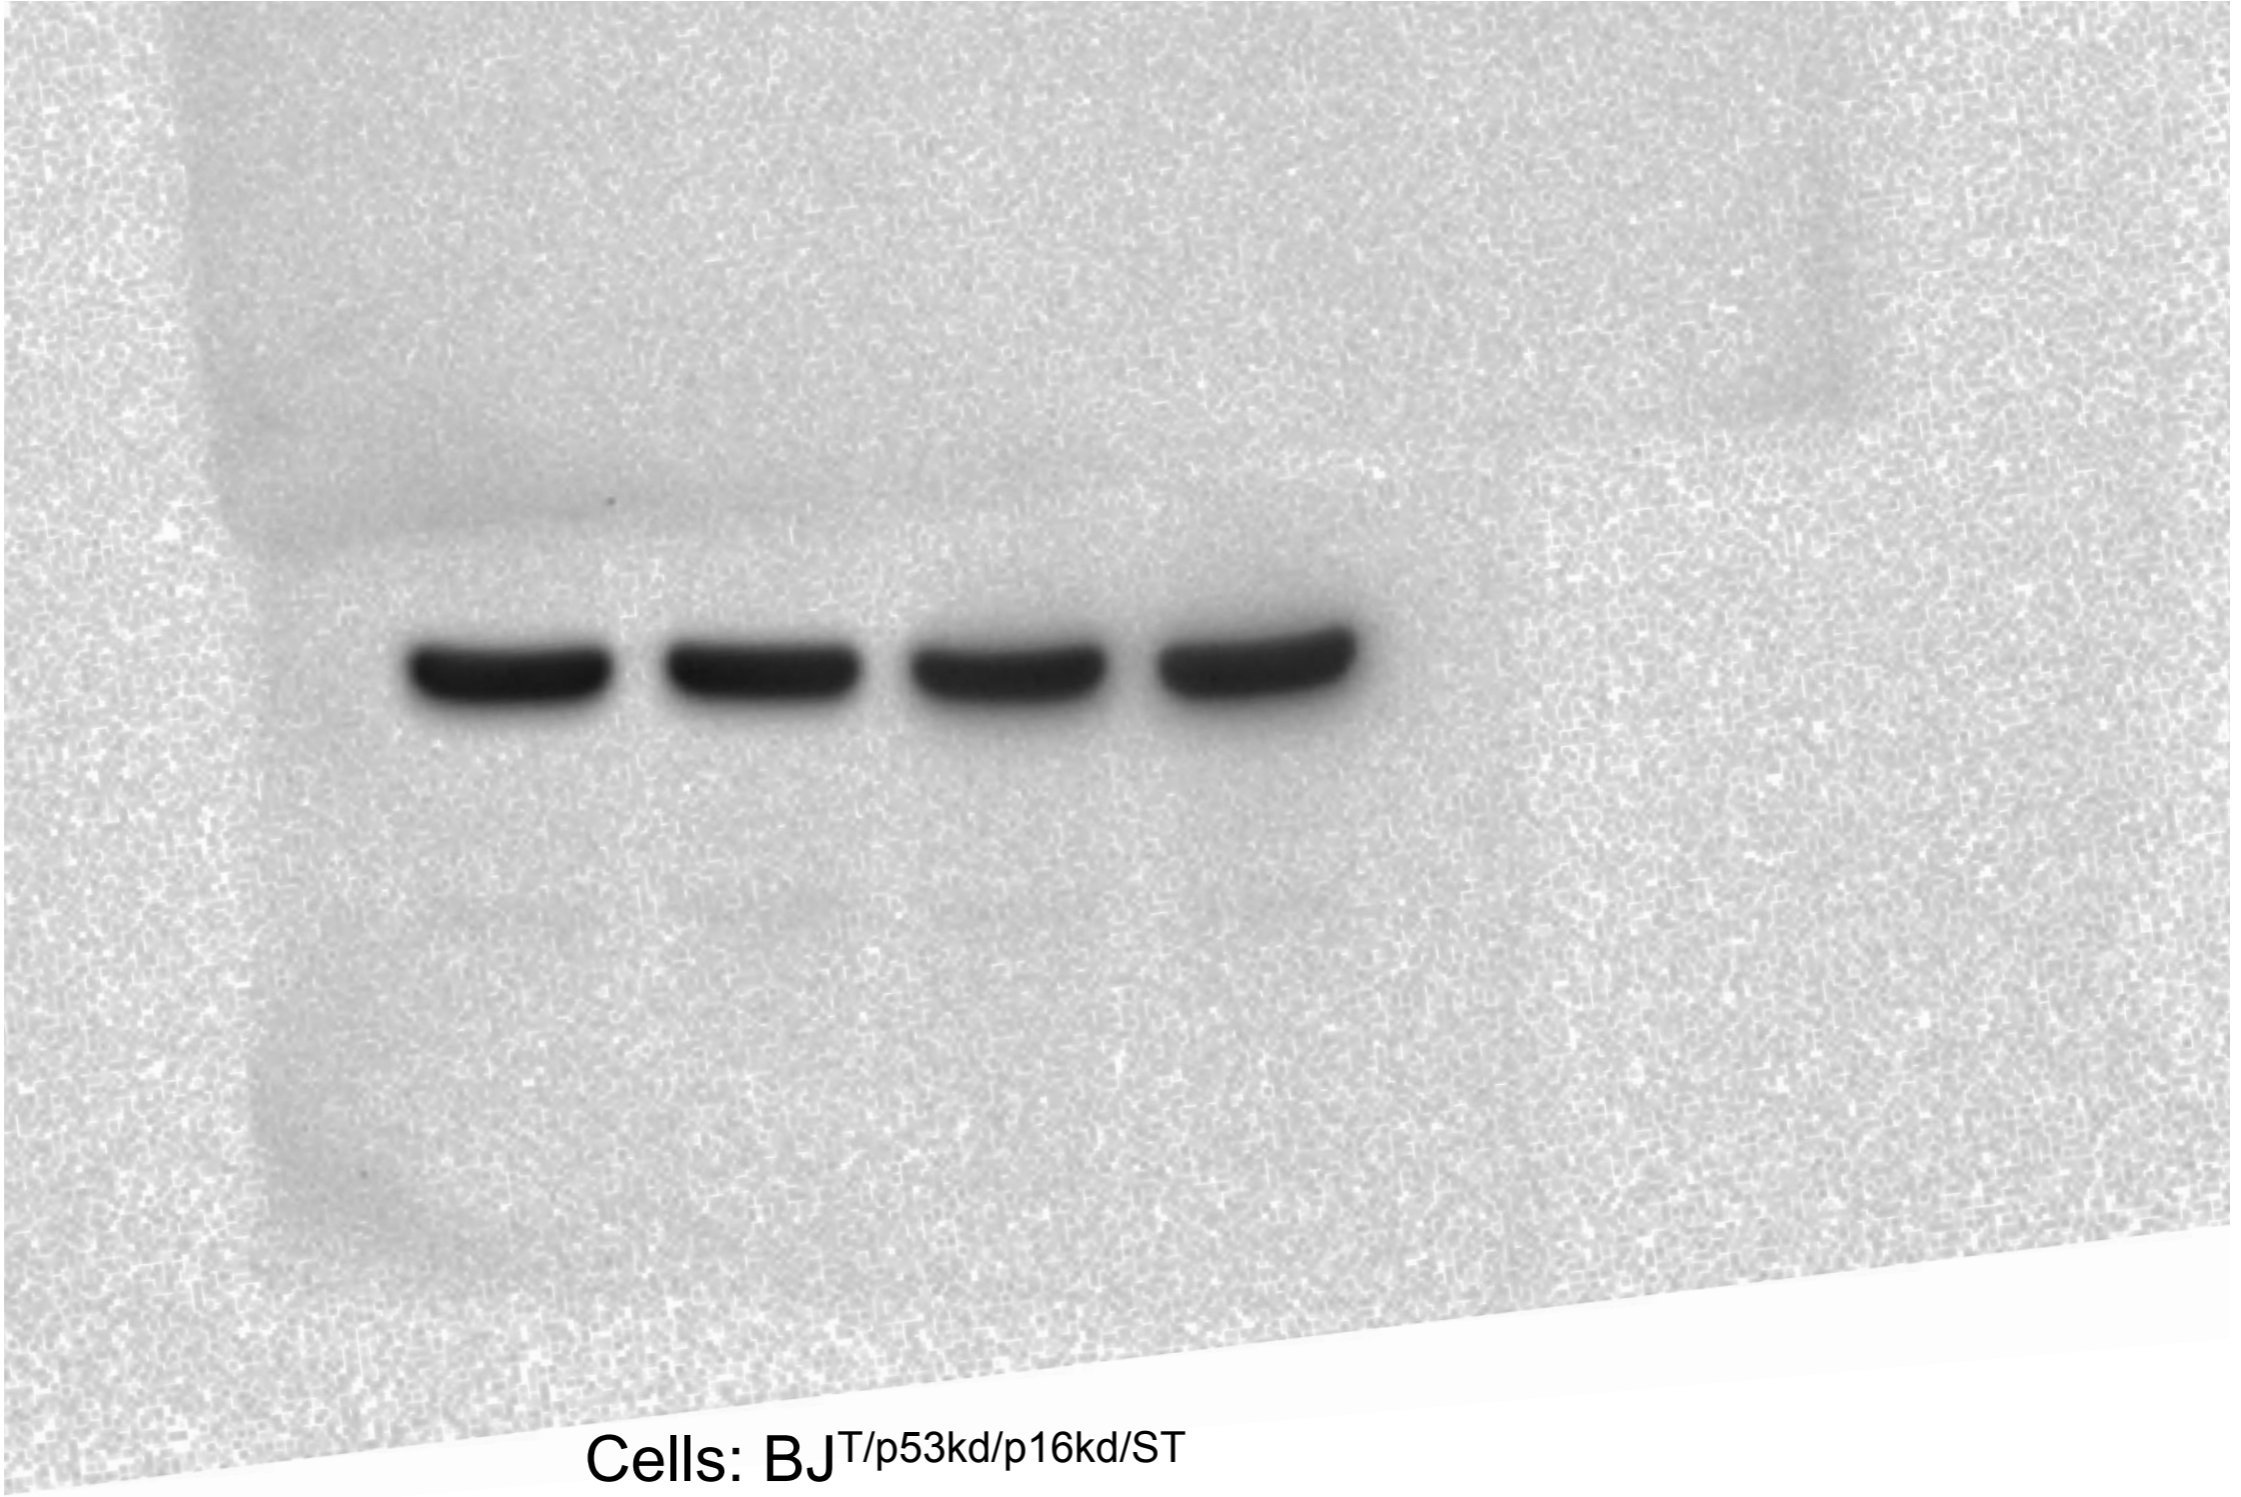

Cells: BJ<sup>T</sup>/p53kd/p16kd/ST

p-EGFR Tyr1068

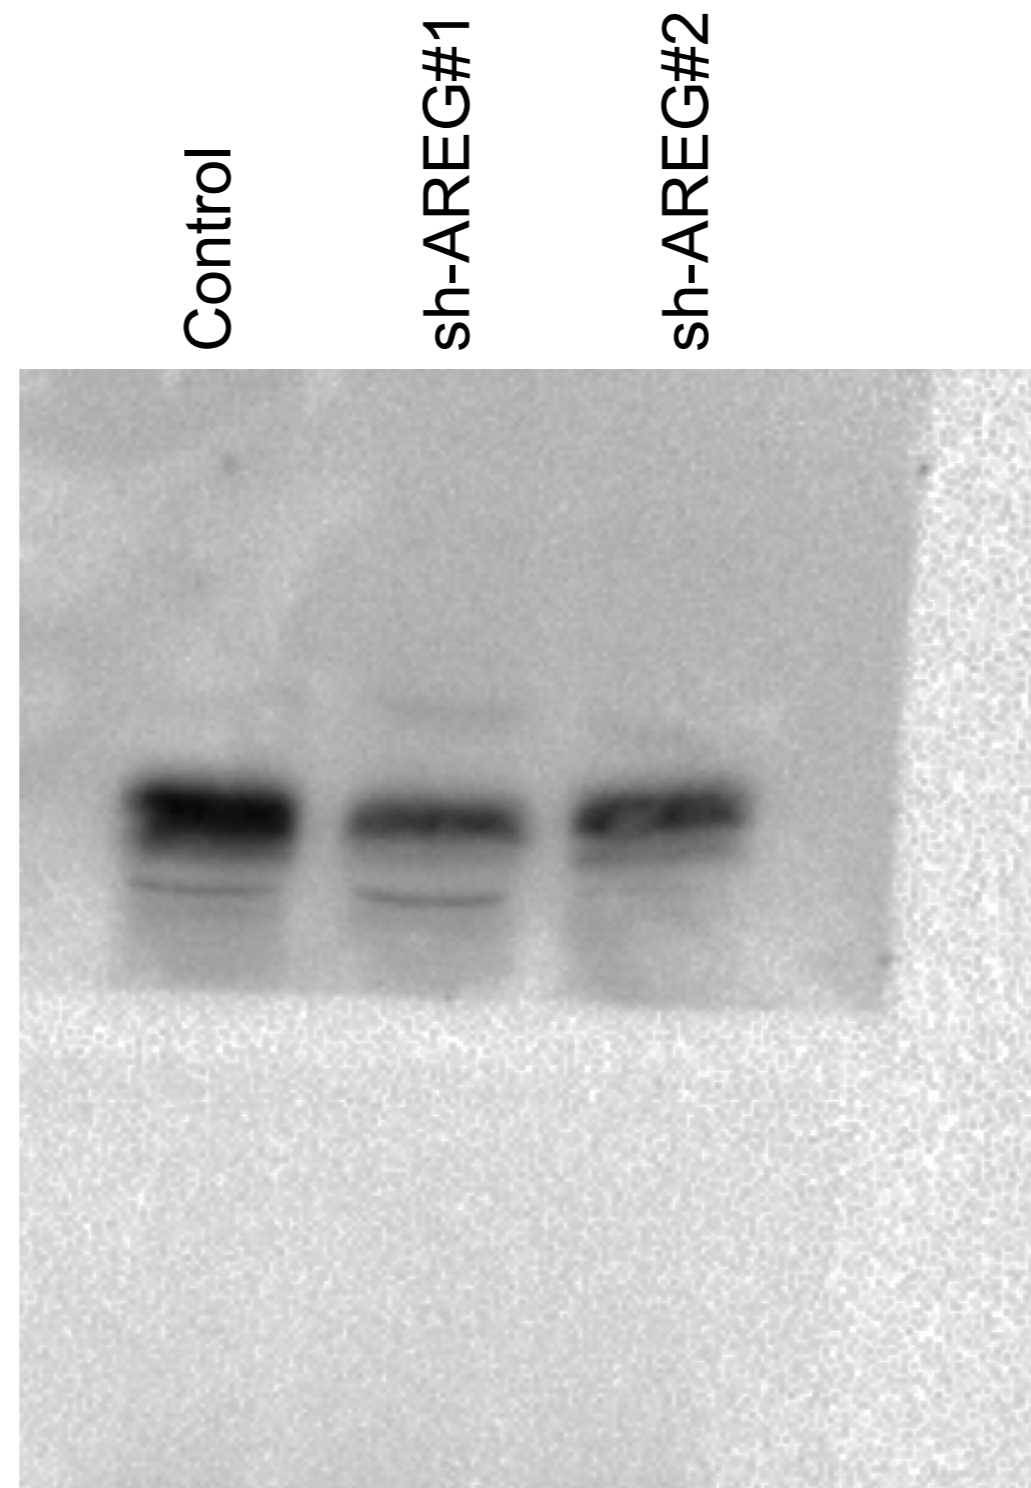

Cells: BJ<sup>T</sup>/p53kd/p16kd/RasV12/ST 6% gel

EGFR

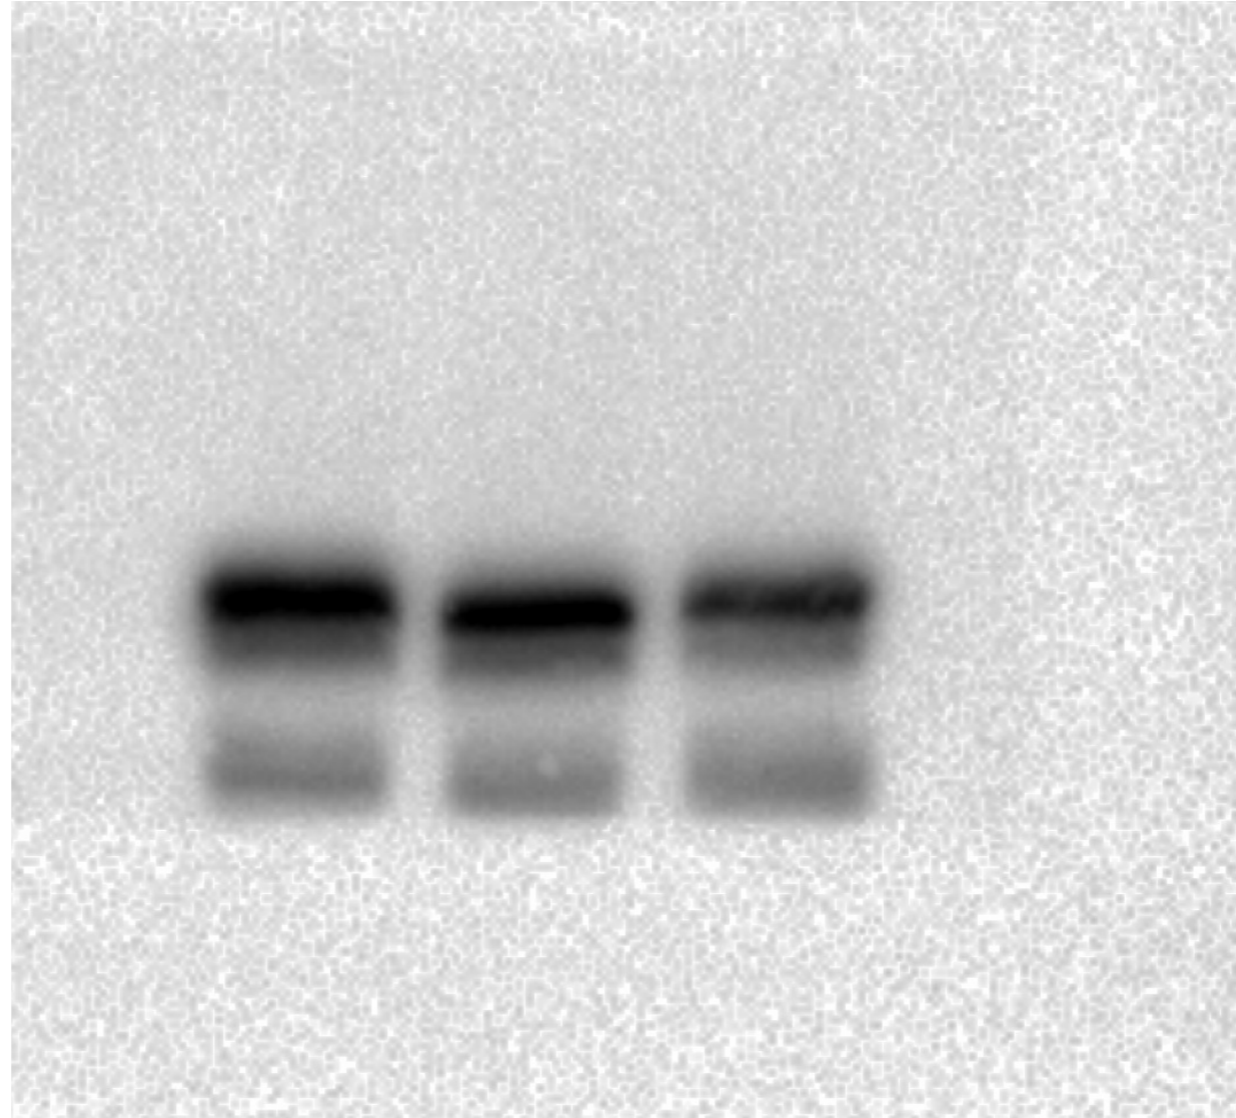

Cells: BJ<sup>T</sup>/p53kd/p16kd/RasV12/ST 6% gel

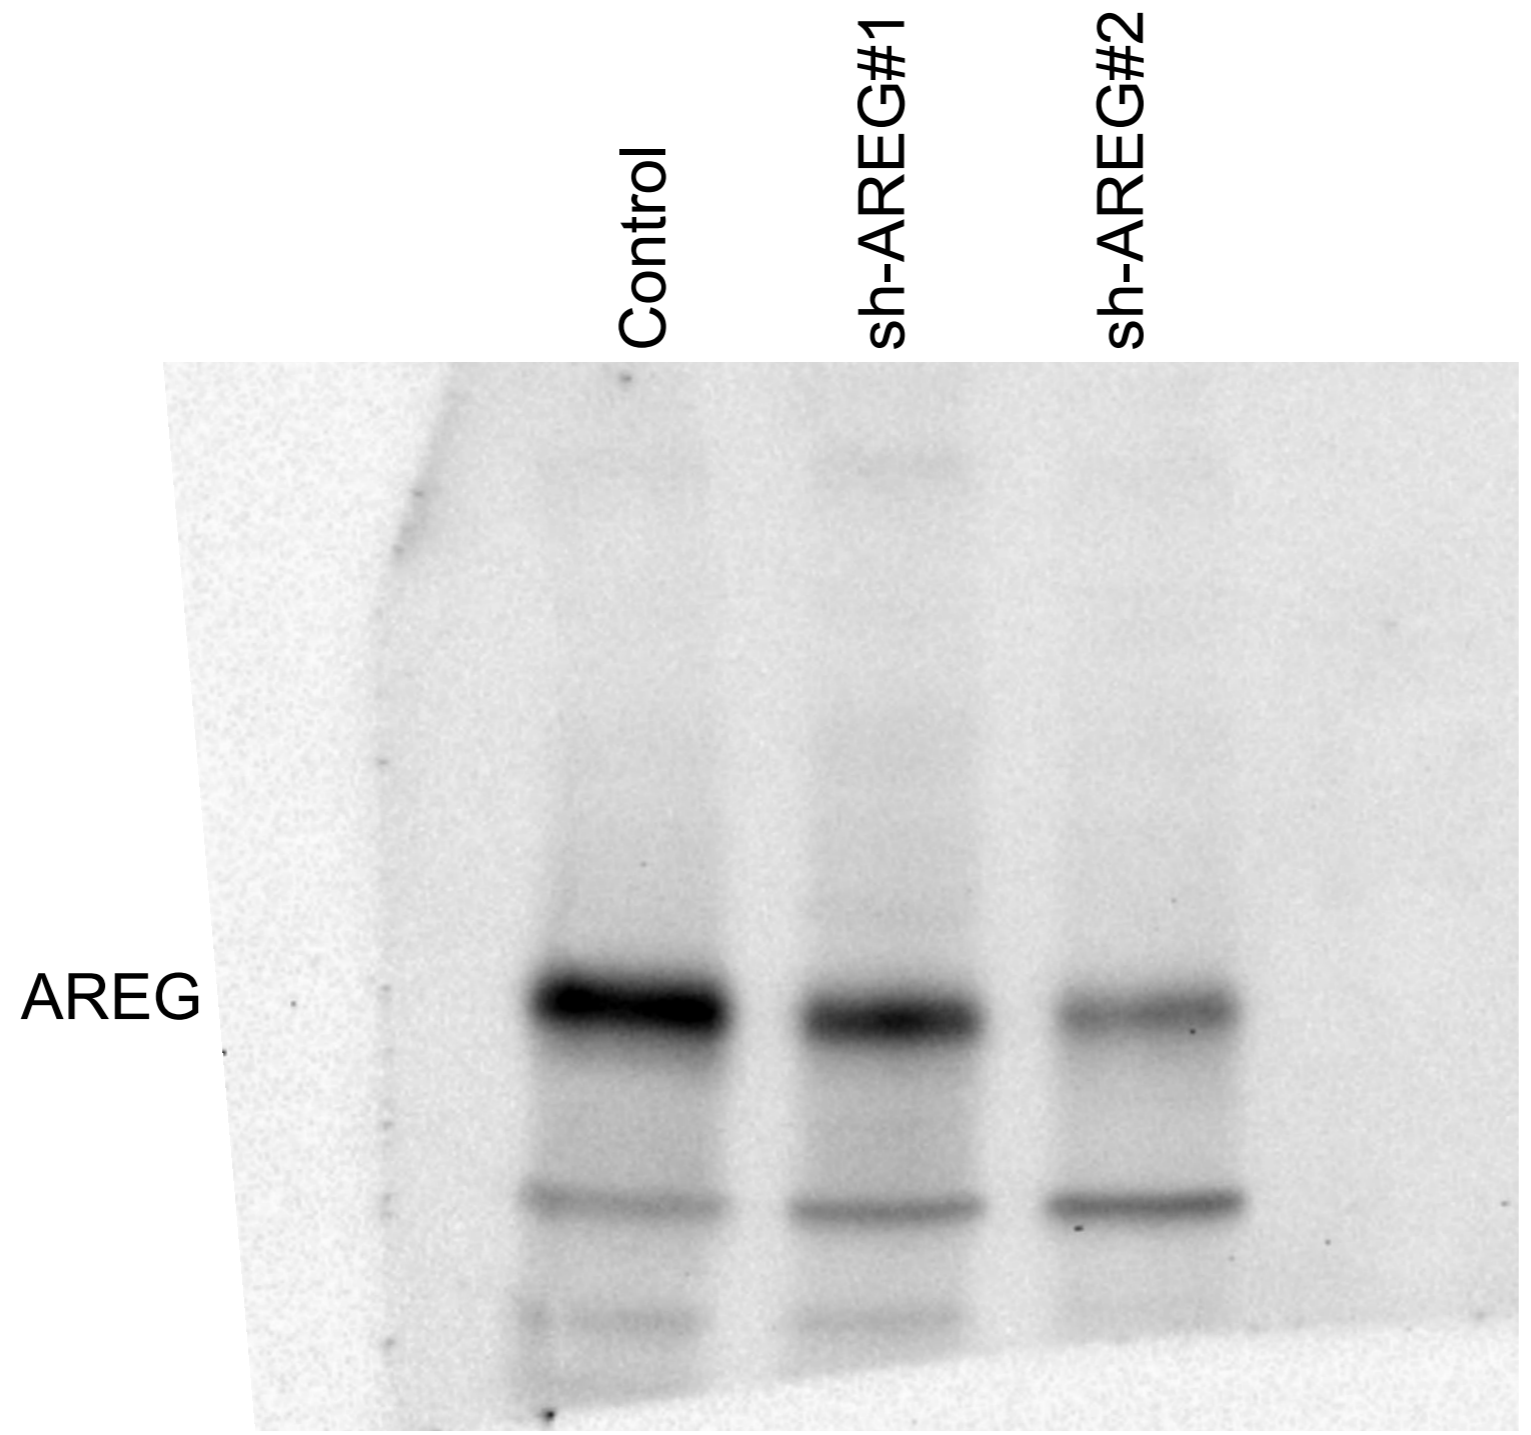

Cells: BJ<sup>T</sup>/p53kd/p16kd/RasV12/ST

14% gel

Control  
sh-AREG#1  
sh-AREG#2

Actin

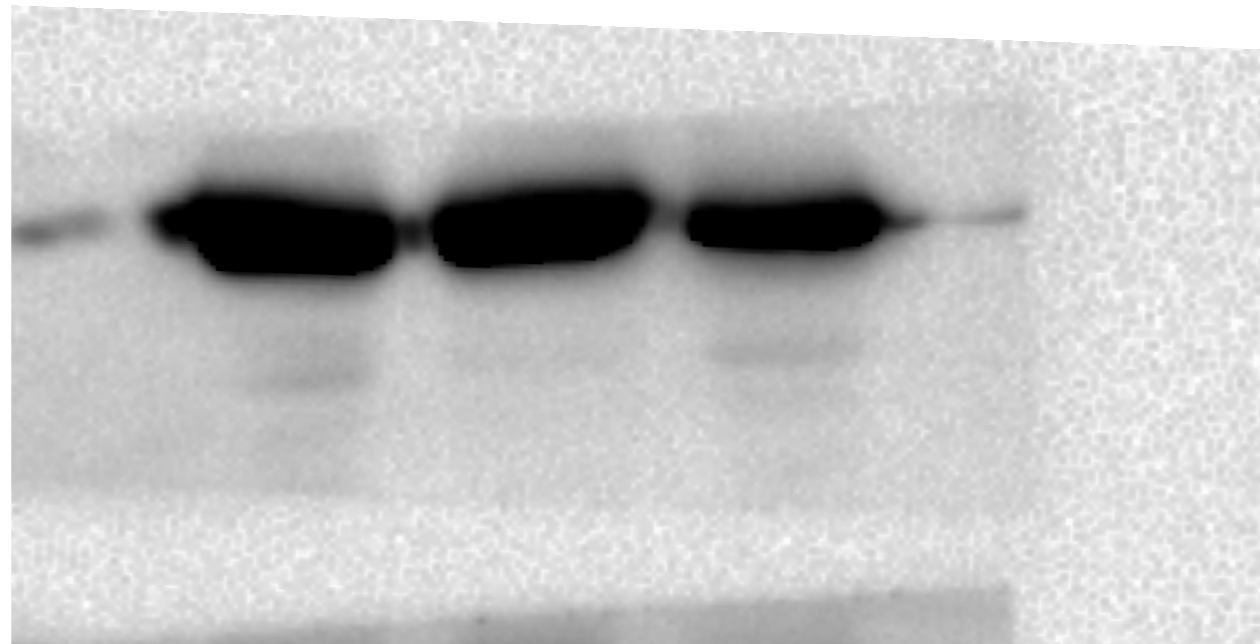

Cells: BJT/p53kd/p16kd/RasV12/ST

14% gel
